# Endothelin-1 induces cellular senescence and fibrosis in cultured myoblasts. A potential mechanism of aging-related sarcopenia

Elena Alcalde-Estévez<sup>1,\*</sup>, Ana Asenjo-Bueno<sup>2,\*</sup>, Patricia Sosa<sup>1</sup>, Gemma Olmos<sup>1,3,4</sup>, Patricia Plaza<sup>2</sup>, María Ángeles Caballero-Mora<sup>5</sup>, Diego Rodríguez-Puyol<sup>3,4,6</sup>, María Piedad Ruíz-Torres<sup>1,3,4,\*</sup>, Susana López-Ongil<sup>2,3,4,\*</sup>

<sup>1</sup>Departamento Biología de Sistemas, Universidad de Alcalá, Alcalá de Henares, Madrid 28871, Spain

<sup>2</sup>Unidad de Investigación de la Fundación para la Investigación Biomédica del Hospital Universitario Príncipe de Asturias, Alcalá de Henares, Madrid 28805, Spain

<sup>3</sup>Instituto Reina Sofía de Investigación Nefrológica (IRSIN) de la Fundación Renal Iñigo Álvarez de Toledo (FRIAT), Madrid 28003, Spain

<sup>4</sup>Area 3-Fisiología y Fisiopatología Renal y Vascular del IRYCIS, Madrid 28046, Spain

<sup>5</sup>Servicio de Geriátría y Unidad de Fragilidad del Hospital de Ciudad Real, Ciudad Real 13003, Spain

<sup>6</sup>Servicio de Nefrología del Hospital Universitario Príncipe de Asturias, Alcalá de Henares, Madrid 28805, Spain

\*Equal contribution

**Correspondence to:** Susana López-Ongil; email: [slorgil@salud.madrid.org](mailto:slorgil@salud.madrid.org)

**Keywords:** endothelin-1, fibrosis, senescence, aging, sarcopenia

**Received:** December 11, 2019

**Accepted:** May 20, 2020

**Published:** June 22, 2020

**Copyright:** Alcalde-Estévez et al. This is an open-access article distributed under the terms of the Creative Commons Attribution License (CC BY 3.0), which permits unrestricted use, distribution, and reproduction in any medium, provided the original author and source are credited.

## ABSTRACT

Endothelial dysfunction, with increased endothelin-1 (ET-1) synthesis, and sarcopenia, characterized by the loss of muscular mass and strength, are two aging-related conditions. However, a relationship between them has not been already established. The aim of this study was to determine whether ET-1 induces senescence and fibrosis in cultured murine myoblasts, which could be involved in the development of sarcopenia related to aging. For this purpose, myoblasts were incubated with ET-1 to assess cellular senescence, analyzed by senescence associated  $\beta$ -galactosidase activity and p16 expression; and fibrosis, assessed by fibronectin expression. ET-1 induced myoblast senescence and fibrosis through ET<sub>A</sub> receptor. The use of antioxidants and several antagonists revealed that ET-1 effect on senescence and fibrosis depended on ROS production and activation of PI<sub>3</sub>K-AKT-GSK pathway. To stress the *in vivo* relevance of these results, circulating ET-1, muscular strength, muscular fibrosis and p16 expression were measured in male C57Bl6 mice from 5-18-24-months-old. Old mice shown high levels of ET-1 correlated with muscular fibrosis, muscular p16 expression and loss of muscle strength. In conclusion, ET-1 promotes fibrosis and senescence in cultured myoblasts, similar results were found in old mice, suggesting a potential role for ET-1 in the development of sarcopenia related to aging.

## INTRODUCTION

The loss of muscular mass and strength is an inevitable aging related phenomenon, named sarcopenia. The mechanisms involved in its origin and progression remain to be clearly elucidated. Malnutrition, decreased

physical exercise and the decline in sex steroid hormone production and in insulin sensitivity play an important role in sarcopenia [1]. Sarcopenic muscles suffer profound changes in their architecture, exhibiting both reduced fiber size and reduced fiber number, especially of the type II fibers, reduced number of satellite cells

and accumulation of connective tissue and fat between the fibers [2–4].

Tissue fibrosis is characterized by the excessive deposition of extracellular matrix (ECM) proteins, including collagens and fibronectin (FN) [5]. Fibrosis is triggered by the action of several growth factors, such as TGF- $\beta$ 1 and CTGF, by fibroblasts activation and by the inflammation process [6, 7]. Progression of chronic diseases in parenchyma organs such as liver, kidney, heart, and lung is associated with fibrosis, and the fibrotic process plays a critical role in the detrimental damage of these organs [6]. In fact, the appearance of fibrotic areas in skeletal muscle has been extensively studied in skeletal muscular dystrophy diseases and has been associated with the loss of muscular strength [8]. In skeletal muscle, fibrosis can result from either acute muscle trauma or chronic injury conditions, with excessive accumulation of ECM components [9]. Muscular fibrosis has been related to the activation of resident fibroblasts [10] or may also be caused by a faulty muscle-repair process initiated by the activation of muscle satellite cells [11]. After damage, satellite cells are activated into proliferating myoblasts that fuse to form new myofibrils. However, in the aged muscle, the regenerative cascade is characterized by a shift in the functional myofibril repair leading to an increase in ECM [12].

One of the mechanisms involved in the decline of satellite cell function in aged muscle is cellular senescence [3, 13], defined by Hayflick as an irreversible arrest of cell division [14]. Cellular senescence can be induced prematurely by activated oncogenes, DNA damage and oxidative stress [15, 16] as well as by extracellular systemic factors such as hyperosmolarity, high glucose [17] and glycated albumin [18]. In this sense, we have recently described that elevated extracellular phosphate concentration induced senescence in cultured myoblasts, disrupting the autophagy mechanism through ILK overexpression [19].

On the other hand, an additional aging-related phenomenon is endothelial dysfunction. A decreased production of nitric oxide together with an increased release of endothelin-1 (ET-1) has been described in some aging-related cardiovascular diseases [20]. ET-1 is a potent vasoconstrictor peptide having mitogenic and proliferative activity [21]. ET-1 plays a pivotal role in vascular remodeling inducing the synthesis of different ECM components [22], induces proliferation and migration of smooth muscle cells [23], and also the fibrotic process [24]. Biological actions of ET-1 necessarily involve the activation of specific G-protein coupled receptors, ET<sub>A</sub> and/or ET<sub>B</sub>, which are present not only in vascular cells but also in numerous tissues including lung, heart, kidney, intestine, adrenal gland,

eye, and brain [25]. High levels of ET-1 have been found in fibrotic diseases affecting lung, kidney, heart, or skin [24]. However, the role of ET-1 in the development of skeletal muscle fibrosis has not been described before.

The relationship between ET-1 and aging has begun to be studied lately. Wang et al. found that fibroblasts isolated from the aged mice hearts and also in aged human hearts expressed high levels of ET-1, suggesting that aging-related cardiac fibrosis was, at least partially, dependent on the upregulation of ET-1 [26]. ET-1 also contributes to the fibrotic phenotype, inducing the expression of collagen, FN and CCN2 in fibroblasts isolated from fibrotic lesions [27]. Moreover, ET-1 has been reported to induce cellular senescence in cultured vascular endothelial cells [28].

We hereby propose that ET-1 increases with age and promotes synthesis of ECM proteins and senescence of myoblasts, leading to muscular fibrosis and contributing to the aging-related loss of muscle force.

## RESULTS

### **Endothelin-1 induces senescence and increases fibronectin expression in cultured murine myoblasts (C<sub>2</sub>C<sub>12</sub>) through ET<sub>A</sub> receptor**

To explore the effect of ET-1 on C<sub>2</sub>C<sub>12</sub>, we first confirmed that cultured myoblasts expressed specific ET-1 receptors. The expression of ET-1 receptors in cultured myoblast was confirmed by western blot and real time-PCR. C<sub>2</sub>C<sub>12</sub> expressed both types of ET receptors, more ET<sub>A</sub> than ET<sub>B</sub> receptors (Supplementary Figure 1), compared with endothelial cells. Then, we tested whether ET-1 induced cellular senescence and extracellular matrix protein expression in myoblast cells. For this purpose, C<sub>2</sub>C<sub>12</sub> were incubated with 1 nM ET-1 at different times to assess cellular senescence by measuring senescent-associated  $\beta$  galactosidase activity (SA- $\beta$ -GAL) and by p16 protein expression. ET-1 induced senescence in C<sub>2</sub>C<sub>12</sub> in a time-response way (Figure 1A, 1B), reaching a peak at 72 h in SA- $\beta$ -GAL activity and at 48h in p16 expression. The effect was mediated by ET<sub>A</sub> receptor as it was blocked in the presence of the dual ET<sub>A/B</sub> receptor antagonist (Bosentan) and of the specific ET<sub>A</sub> receptor antagonist (BQ123), but not in the presence of the specific ET<sub>B</sub> receptor antagonist (BQ788) (Figure 1C, 1D). Proliferation of myoblasts after treatment with ET-1 was checked by expression of proliferating cell nuclear antigen (PCNA) by western blot assays. Cells treated with ET proliferated less than control cells, suggesting that myoblasts underwent a growth arrest upon ET treatment (Supplementary Figure 2). FN expression was also measured after ET-1 addition to evaluate potential

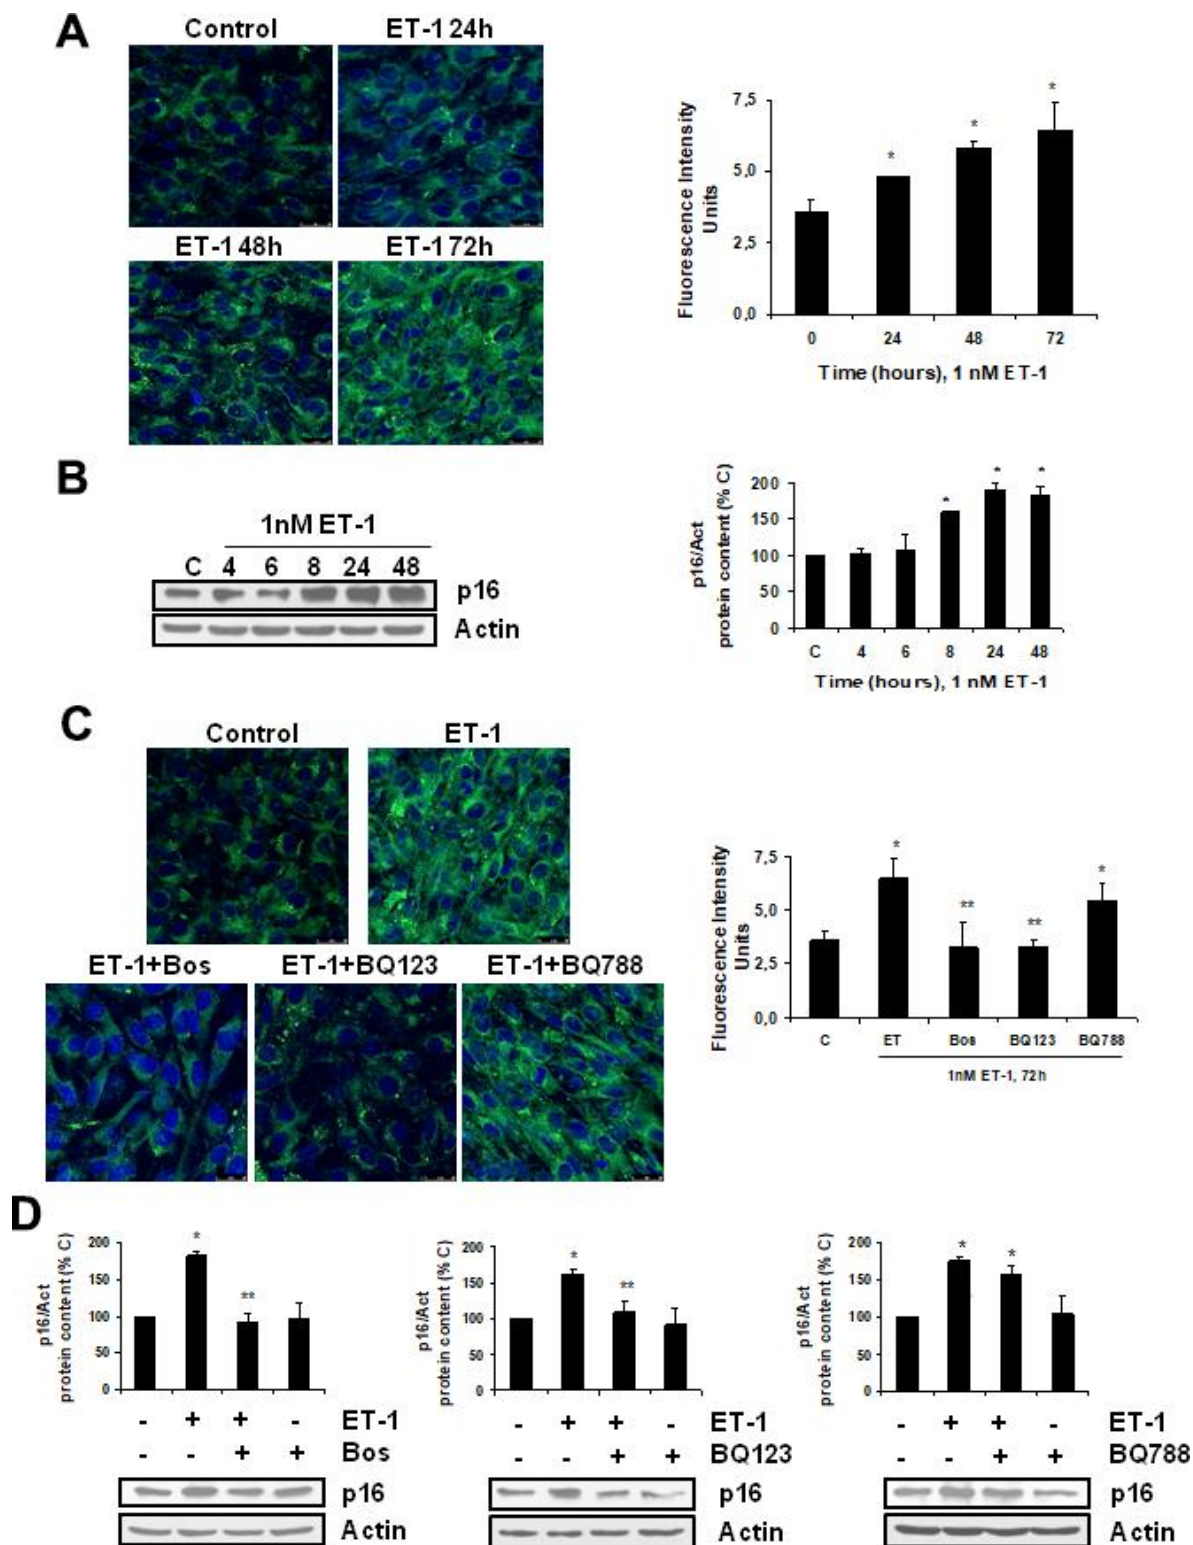

**Figure 1. Endothelin-1 induces senescence in mouse myoblasts ( $C_2C_{12}$ ) through  $ET_A$  receptor.** Cells were grown on coverslips (A, C) and incubated with 1 nM ET-1 at different times (A, B), or incubated with 10  $\mu$ M Bosentan (Bos), 100 nM BQ-123 (BQ123) or 100 nM BQ-788 (BQ788) added 30 min before ET-1 (1 nM), and then incubated for 72h (C) or 48h (D). Then, senescence was tested measuring SA- $\beta$ -GAL activity (panel A, C) and protein content from p16 (panel B, D). Representative microphotographs are shown on the left with 40x magnification and the densitometric analysis is shown on the right panel A, C. Scale bar, 50  $\mu$ m. A representative Western blot of p16 is shown next to the densitometric analysis on the panel B, D. Values are the mean  $\pm$  SEM of 6 independent experiments, \* $p$ <0.05 vs. control cells (C or time 0), and \*\* $p$ <0.05 vs ET alone.

fibrosis at different times, as FN is an important ECM protein. ET-1 was able to induce FN expression, not only at mRNA levels (Figure 2A) but also at protein levels (Figure 2B) after 8 h incubation, reaching a maximum effect between 8-24 h. This effect was also mediated by ET<sub>A</sub> receptor as it was blocked in the presence of the specific ET<sub>A</sub> receptor antagonist (BQ123), but not of the specific ET<sub>B</sub> receptor antagonist (BQ788) assessed by both western blot and immunofluorescence staining (Figure 2C, 2D). Figure 2D shows as ET-1 induced, not only intracellular FN expression in red, but also extracellular FN expression in green. Both of them are mediated by ET<sub>A</sub> receptor.

To analyze whether there was a link between fibrosis and cellular senescence, we evaluated the effect of FN itself at different times and doses on cellular senescence. FN was able to induce senescence on myoblasts just as ET-1 did, which was evaluated by measuring SA-β-GAL activity and p16 protein content (Figure 3A, 3B), reaching a peak with FN 2.5 μg/ml at 48 h. Tirofiban (TF, 50 μM), a peptide preventing the effect of FN, blocked the effects of FN and ET-1 on senescence (Figure 3C, 3D), suggesting that ET-1 effect on myoblast senescence was related to the increase in FN expression. Additional experiments to silence ILK were done to check if the effect of FN on senescence is mediated by ILK activation. Results suggest that ILK could mediate FN-induced senescence as cells without ILK did not increase p16, whereas cells with ILK showed p16 overexpression under FN treatment (Figure 3E).

### **Endothelin-1 effect on senescence and fibronectin expression depends on ROS production and on the activation of PI<sub>3</sub>K-AKT-GSK pathway through ET<sub>A</sub> receptor**

To examine the intracellular mechanisms involved in ET effect on senescence and fibronectin expression, we studied the reactive oxygen species (ROS) production and also the role of PI<sub>3</sub>K-AKT-GSK pathway.

Firstly, ET-1 was able to induce ROS production (Figure 4A), reaching a maximum peak around 8-16 h, and it was completely blocked in the presence of the antioxidant N-acetylcysteine (NAC) and also of the specific ET<sub>A</sub> receptor antagonist (BQ123) (Figure 4B). ROS production also seems to be involved in the mechanism of action of ET-1, because the use of NAC blocked not only the FN expression (Figure 4C), but also the cellular senescence, measured as SA-β-GAL activity (Figure 4E) and as p16 protein expression (Figure 4D).

Secondly, the role of PI<sub>3</sub>K-AKT-GSK was assessed since other authors proposed it as a pathway implicated in profibrotic actions of ET-1 [29]. ET-1 induced AKT and

GSK phosphorylation without changing the expression of total AKT or total GSK proteins (Figure 5A, 5B), confirming that ET-1 induces activation of this pathway in our cells. Then, different antagonists were added to block PI<sub>3</sub>K-AKT-GSK pathway such as wortmannin (WTN, 10 μM) which blocks phosphatidylinositol 3-kinase (PI<sub>3</sub>K) preventing phosphorylation and activation of AKT; and the AKT inhibitor (I-AKT, 30 μM), which blocks phosphorylation of GSK-3β. In addition, specific antagonist of ET<sub>A</sub> (BQ123, 100 nM) and ET<sub>B</sub> (BQ788, 100 nM) were used to confirm that the effect was mediated by ET<sub>A</sub> receptor and not by ET<sub>B</sub> receptor. All antagonists except BQ788 were able to block phosphorylation of AKT and GSK induced by ET-1 1 nM for 24 h (Figure 5C). The use of NAC also reduced the phosphorylation of AKT and GSK proteins (Figure 5D), suggesting that ROS are implied in the activation of PI<sub>3</sub>K-AKT-GSK pathway. FN expression and senescence induced by ET-1 was assessed in the presence of WTN, I-AKT and also LY-294,002 hydrochloride (LY, 50 μM) which blocks phosphatidylinositol 3-kinase (PI<sub>3</sub>K) preventing phosphorylation and activation of AKT. All of them blocked not only the ET-1 effect on FN expression studied by Western blot (Figure 6A) and by immunofluorescence (Figure 6B), but also the effect of ET-1 on senescence studied by p16 protein expression (Figure 6C) and by SA-β-GAL activity (Figure 6D). These results point to ET-1-induced ROS could activate PI<sub>3</sub>K-AKT-GSK pathway and then stimulate FN expression and myoblast senescence.

Fibrosis is often the consequence of inflammation and inflammation is known to trigger senescence in cells and tissues. The effect of ET-1 on the expression of several cytokines such as TNF-α, IL-6 and MCP-1 was evaluated by real time PCR. ET-1 induced expression of these cytokines at short times, returning to baseline after 16h, suggesting that ET-1 might induce inflammation in the first place (Supplementary Figure 3), which could be involved in development of fibrosis and senescence induced by ET-1.

### **Aged mice showed high levels of circulating ET-1 and muscular fibrosis**

To stress the *in vivo* relevance of these results, ET-1 serum levels were measured in male C57Bl6 mice at different ages: 5, 18 and 24 months-old. Results showed that ET-1 levels increased with age, reaching a maximum at 24 months (Figure 7A). Muscle force was measured by the 4 limb grip strength test on the same animals, finding an age-related significant reduction (Figure 7B). Then, histological analysis to look for the appearance of muscular fibrosis was performed in the gastrocnemius and the tibialis anterior muscle on the same animals using Sirius Red staining. In addition, FN protein expression

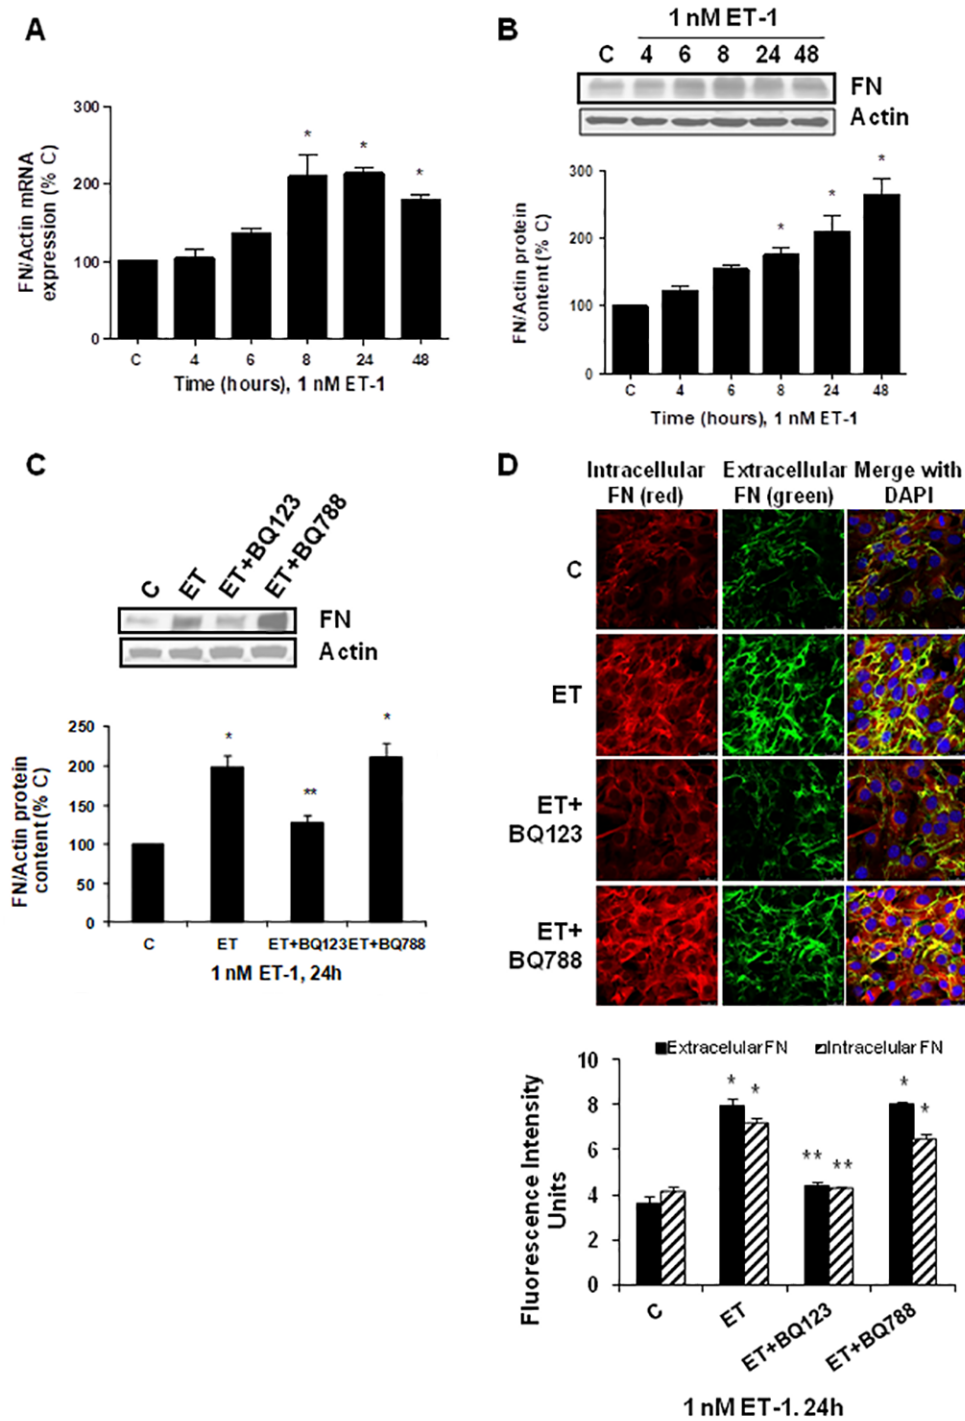

**Figure 2. Endothelin-1 increases FN expression in mouse myoblasts (C<sub>2</sub>C<sub>12</sub>) through ET<sub>A</sub> receptor.** Cells were incubated with 1 nM ET-1 at different times. Then, FN mRNA expression was assessed by RT-qPCR (panel A) and FN protein content by Western blot (panel B). To study the ET receptor implicated, cells were incubated with 100 nM BQ-123 (BQ123) or 100 nM BQ-788 (BQ788) added 30 min before ET-1 (1 nM), and then incubated for 24h. Then, FN protein content (panel C) as well as intracellular FN (in red) and extracellular FN (in green) expression (panel D) were studied by Western and immunofluorescence, respectively. In the experiments of the analysis of protein content, a representative Western blot is shown at the top with the densitometric analysis below (panel B, C). Values are the mean±SEM of 6 independent experiments, \*p<0.05 vs. control cells (C), and \*\*p<0.05 vs ET alone.

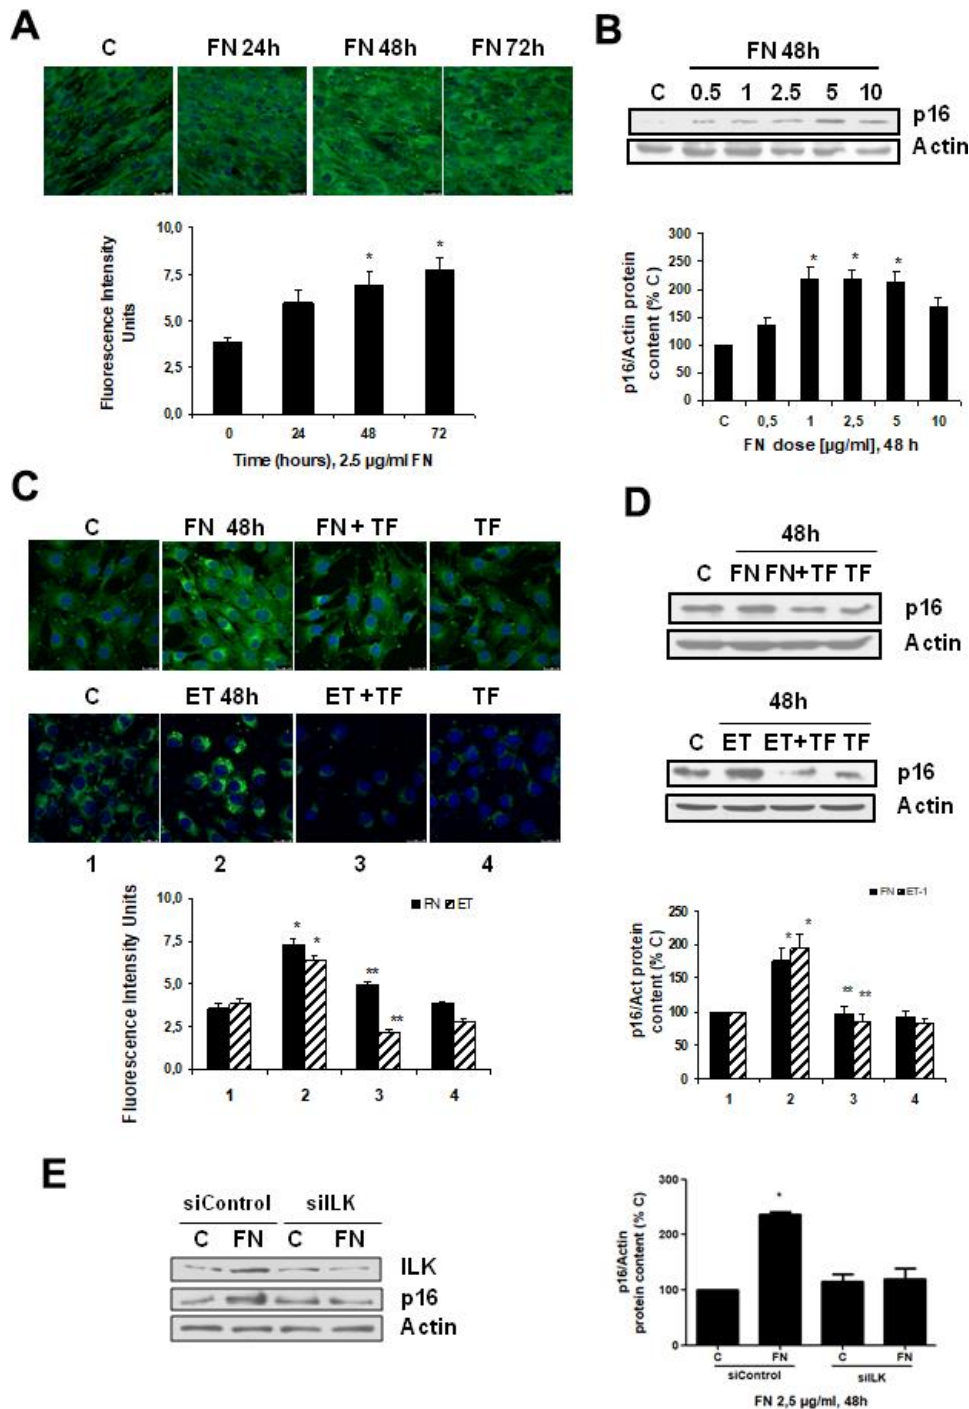

**Figure 3. Fibronectin induces senescence in mouse myoblasts (C<sub>2</sub>C<sub>12</sub>) through integrin/ILK activation.** Cells were grown on coverslips (panels A, C) to test senescence measuring SA-β-GAL activity and p16 protein content by Western blot (panels B, D). (A) Cells were incubated with 2.5 μg/ml FN at different times to assess SA-β-GAL activity by confocal microscopy. (B) Cells were incubated at different doses of FN for 48h to analyze p16 protein content. (C) Cells were incubated with 2.5 μg/ml FN or 1 nM ET-1 in the presence or not of 50 μM Tirofiban (TF) for 48h to assess senescence by SA-β-GAL activity (panel C) or by p16 protein content (panel D). Representative microphotographs are shown at the top with 40x magnification and the densitometric analysis is shown below. Scale bar, 50 μm. A representative Western blot of p16 is shown at the top and the densitometric analysis is shown below. In panels C and D closed bars represent data of FN treatment and striped bars represent data of ET-1 treatment; lane 1: control cells; lane 2: FN or ET alone; lane 3: FN or ET plus TF; lane 4: TF alone. Values are the mean±SEM of 6 independent experiments, \*p<0.05 vs. control cells (C or time 0), and \*\*p<0.05 vs. ET or FN alone. (E) Cells were transfected with siRNA against ILK or scrambled as siControl to assess senescence by p16 protein content upon 2.5 μg/mL FN treatment for 48h. A representative Western blot of ILK and p16 are shown on the left panel and the densitometric analysis is shown on the right. Values are the mean±SEM of 3 independent experiments, \*p<0.05 vs. control cells (C from siControl).

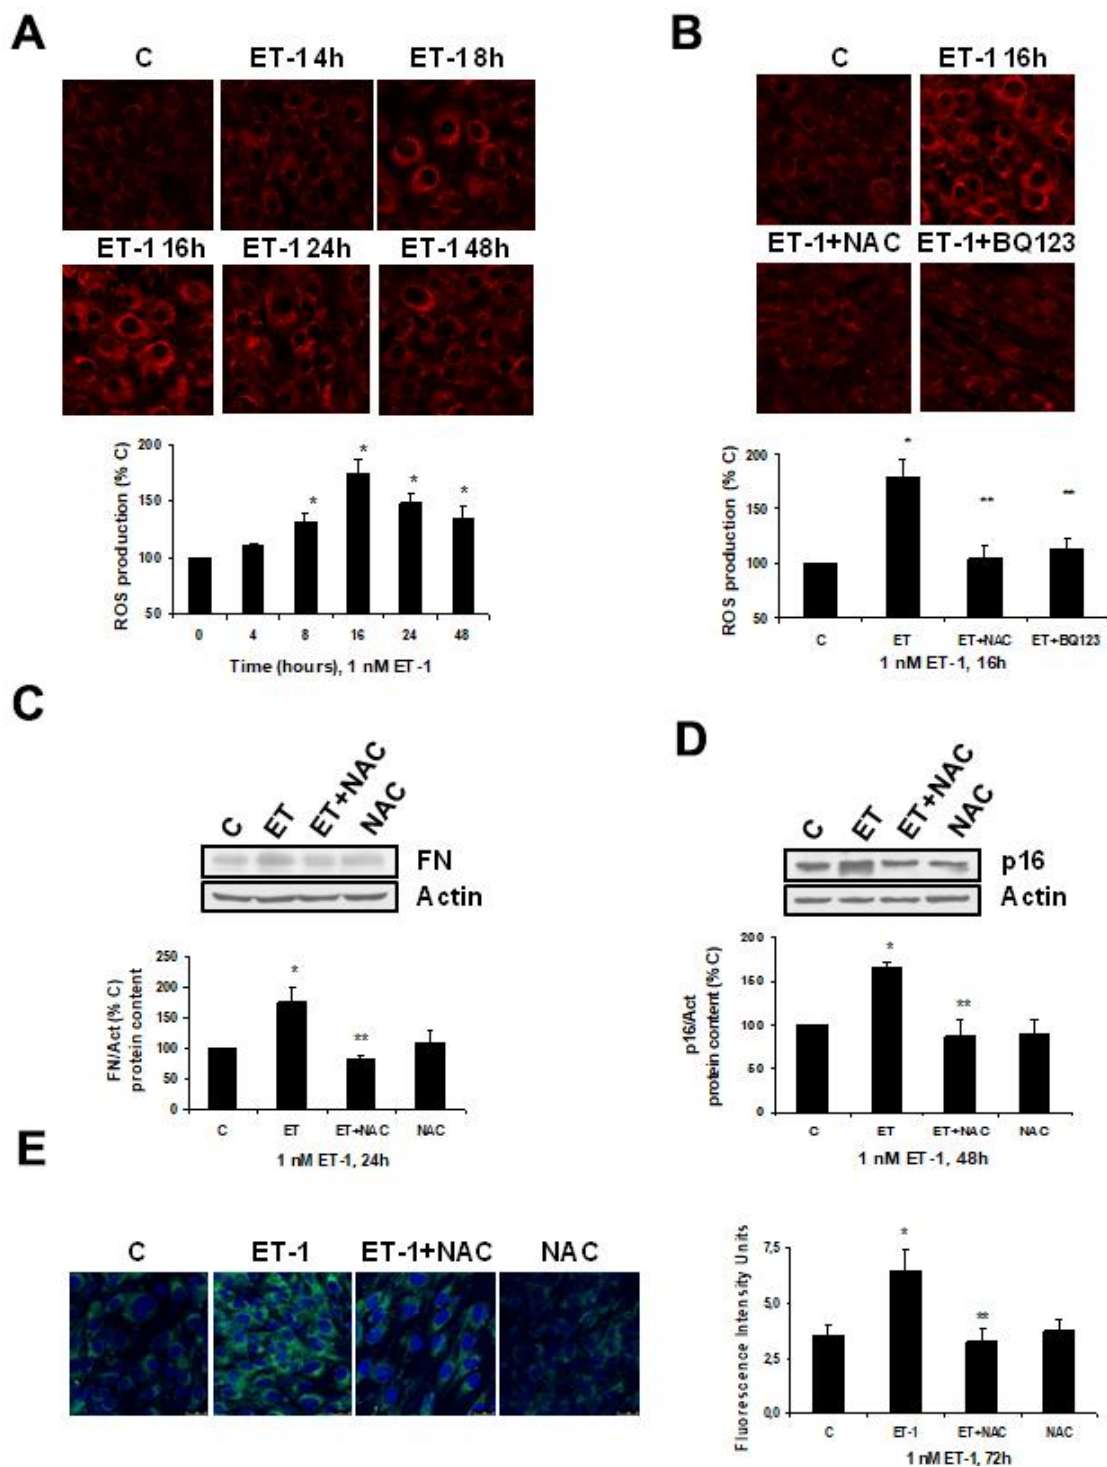

**Figure 4. Role of ROS in endothelin-dependent fibrosis and cellular senescence.** (A, B) Cells were incubated with 1 nM ET-1 at different times, some cells were incubated in the presence of 100  $\mu$ M N-acetylcysteine (NAC) or 100 nM BQ123, and then 1 nM ET-1 was added and incubated for 16h (B). CellROX probe was added during the last 30 min of incubation. After being washed twice, *in vivo* cells were visualized by microscopy confocal to test ROS production in red. Representative microphotographs are shown at the top with 40x magnification, scale bar, 50  $\mu$ m. The densitometric analyses are shown below. (C–E) Cells were incubated with 1 nM ET-1 in the presence of 100  $\mu$ M NAC to assay FN protein expression by Western blot (C). Cellular senescence was assessed by measuring p16 protein content for 48h by Western blot (panel D) and SA- $\beta$ -GAL activity for 72h (panel E). A representative Western is shown on the top with the densitometric analysis below (panels C, D). Representative microphotographs are shown on the left panel E with 40x magnification and the densitometric analysis is shown on the right. Scale bar, 50  $\mu$ m. Values are the mean  $\pm$  SEM of 6 independent experiments, \* $p$ <0.05 vs. control cells (C or time 0), and \*\* $p$ <0.05 vs ET alone.

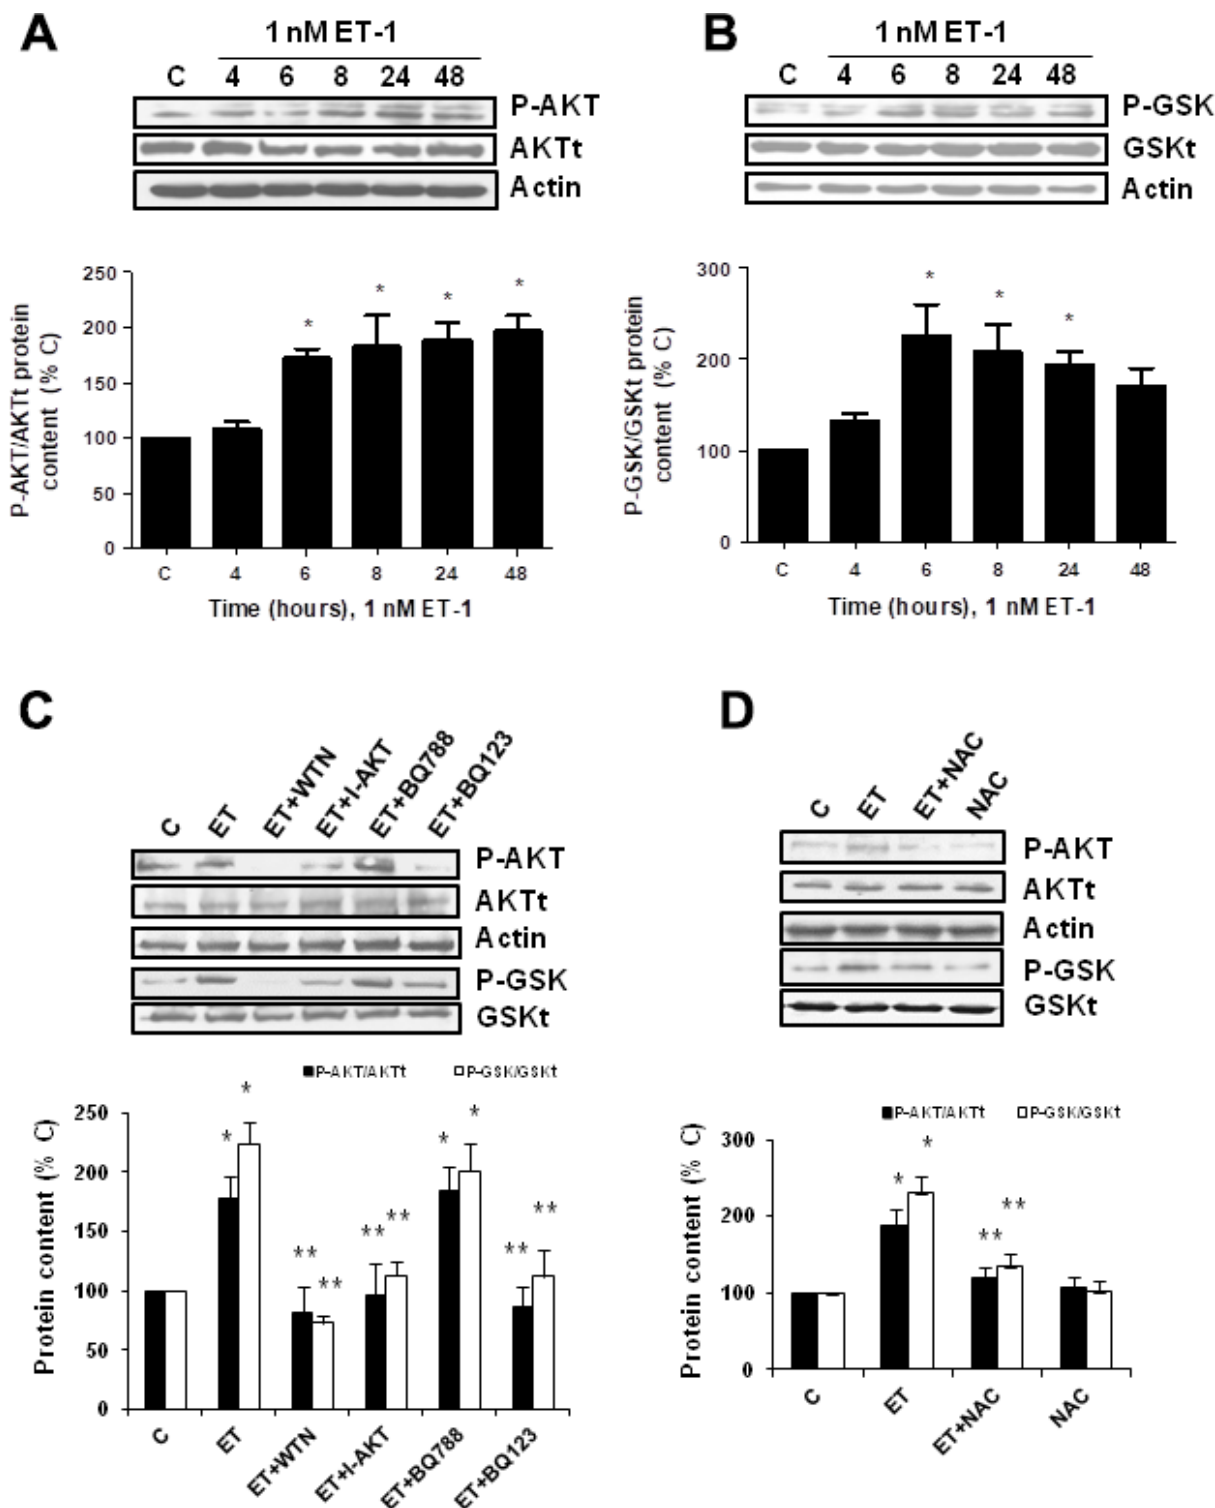

**Figure 5. Endothelin-1 induces activation of PI<sub>3</sub>K-AKT-GSK pathway in mouse myoblasts (C<sub>2</sub>C<sub>12</sub>) through ET<sub>A</sub> receptor and ROS production.** (A, B) Cells were incubated with 1 nM ET-1 at different times. Activation of PI<sub>3</sub>K-AKT-GSK pathway was analyzed by Western blot measuring phosphorylation of AKT (P-AKT, panel A) and phosphorylation of GSK (P-GSK, panel B). (C, D) Cells were incubated in the presence of different antagonists to block PI<sub>3</sub>K-AKT-GSK pathway (Wortmannin: 10 μM WTN; AKT inhibitor: 30 μM I-AKT), to block ET receptors (ET<sub>A</sub> receptor antagonist: 100 nM BQ123; ET<sub>B</sub> receptor antagonist: 100 nM BQ788) (C), and to block ROS production (antioxidant N-acetylcysteine: 100 μM NAC) (D). All of them were added at least 30 min before 1 nM ET-1 for 24h, to assay P-AKT (closed bars) or P-GSK (open bars). Representative Western blots are shown at the top of each panel. The densitometric analysis is shown below of each panel. Values are the mean±SEM of 5 independent experiments, \*p<0.05 vs. control cells (C), and \*\*p<0.05 vs ET alone.



was also analyzed by Western blot in those muscles. Figure 7 shows representative experiments from young mice from 5-month-old compared with old mice from 24-month, showing more fibrotic areas in old mice than in young mice (Figure 7C) and a significant increase in FN protein content in gastrocnemius and tibialis anterior muscle from 24-month mice compared with young mice (5-month) (Figure 7D). Furthermore, p16 protein expression was also evaluated by western blot in the gastrocnemius and the tibialis anterior muscles, finding a

significant increment in old mice versus young mice (Figure 7E), suggesting a potential senescence in aged muscles. Figure 7F shows different correlation data in the gastrocnemius muscle, there are a significant negative correlation between muscular strength from mice measured with grip test and their levels of ET-1, muscular fibrosis measured as Sirius red staining and senescence evaluated by p16 protein content. Additionally, there are a significant correlation between levels of ET-1 and the appearance of muscular fibrosis and senescence.

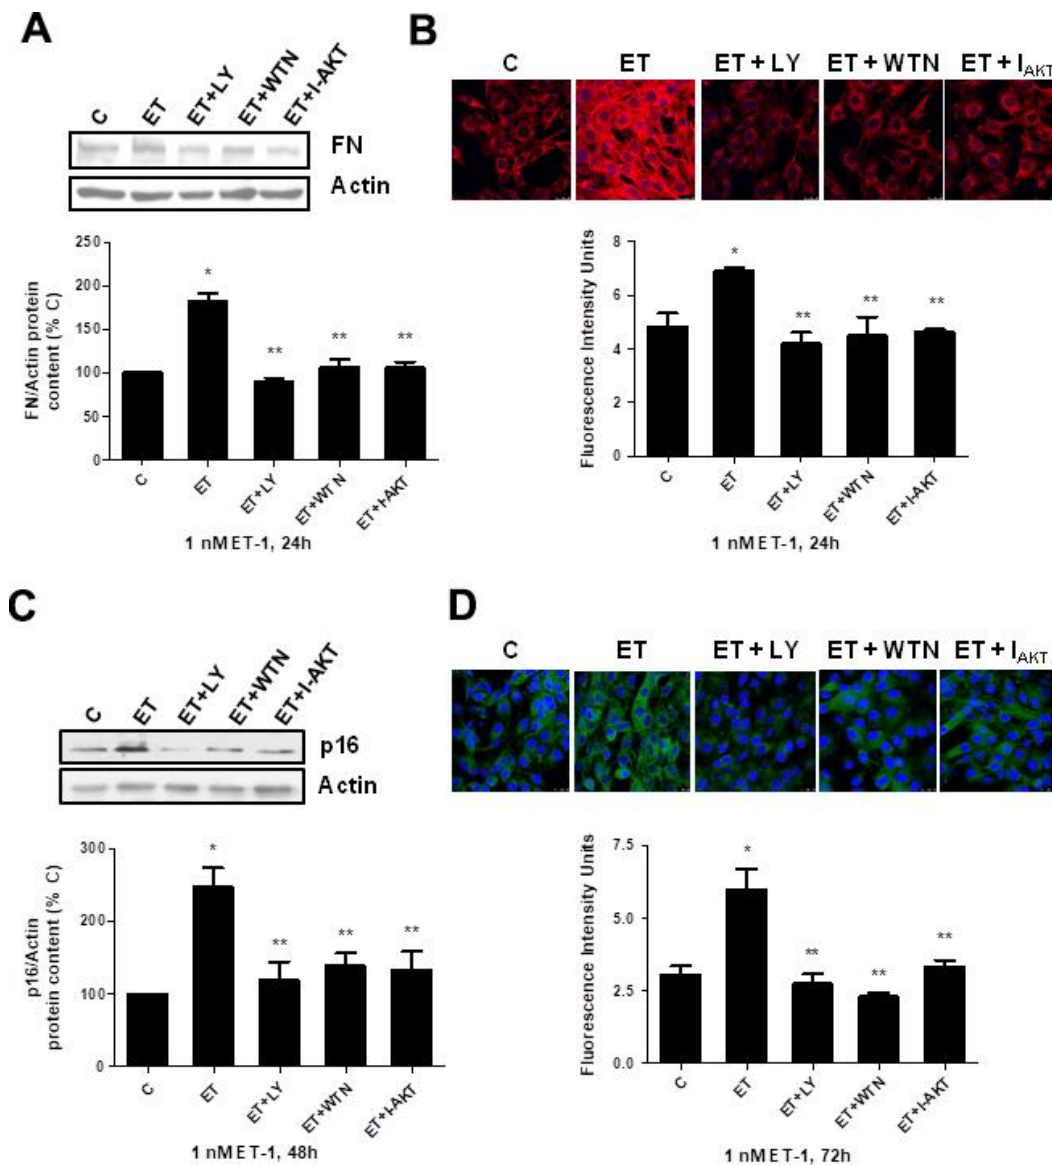

**Figure 6. Role of PI<sub>3</sub>K-AKT-GSK pathway in endothelin-dependent cellular fibrosis and cellular senescence.** Cells were incubated in the presence of different antagonists to block PI<sub>3</sub>K-AKT-GSK pathway (Wortmannin: 10  $\mu$ M WTN; LY-294,002 hydrochloride: 50  $\mu$ M LY; AKT inhibitor: 30  $\mu$ M I-AKT). All of them were added at least 30 min before adding 1 nM ET-1 for 24h to assay FN expression by Western blot (panel A) or by Immunofluorescence (panel B), and to assay senescence by measuring p16 protein content for 48h by Western blot (panel C) and SA- $\beta$ -GAL activity for 72h (panel D). Representative Western blots are shown at the top of panels (A, C). Representative microphotographs are shown on the top of panel B, D with 40x magnification, scale bar, 50  $\mu$ m. The densitometric analysis is shown below of each panel. Values are the mean $\pm$ SEM of 6 independent experiments, \* $p$ <0.05 vs. control cells (C), and \*\* $p$ <0.05 vs ET alone.

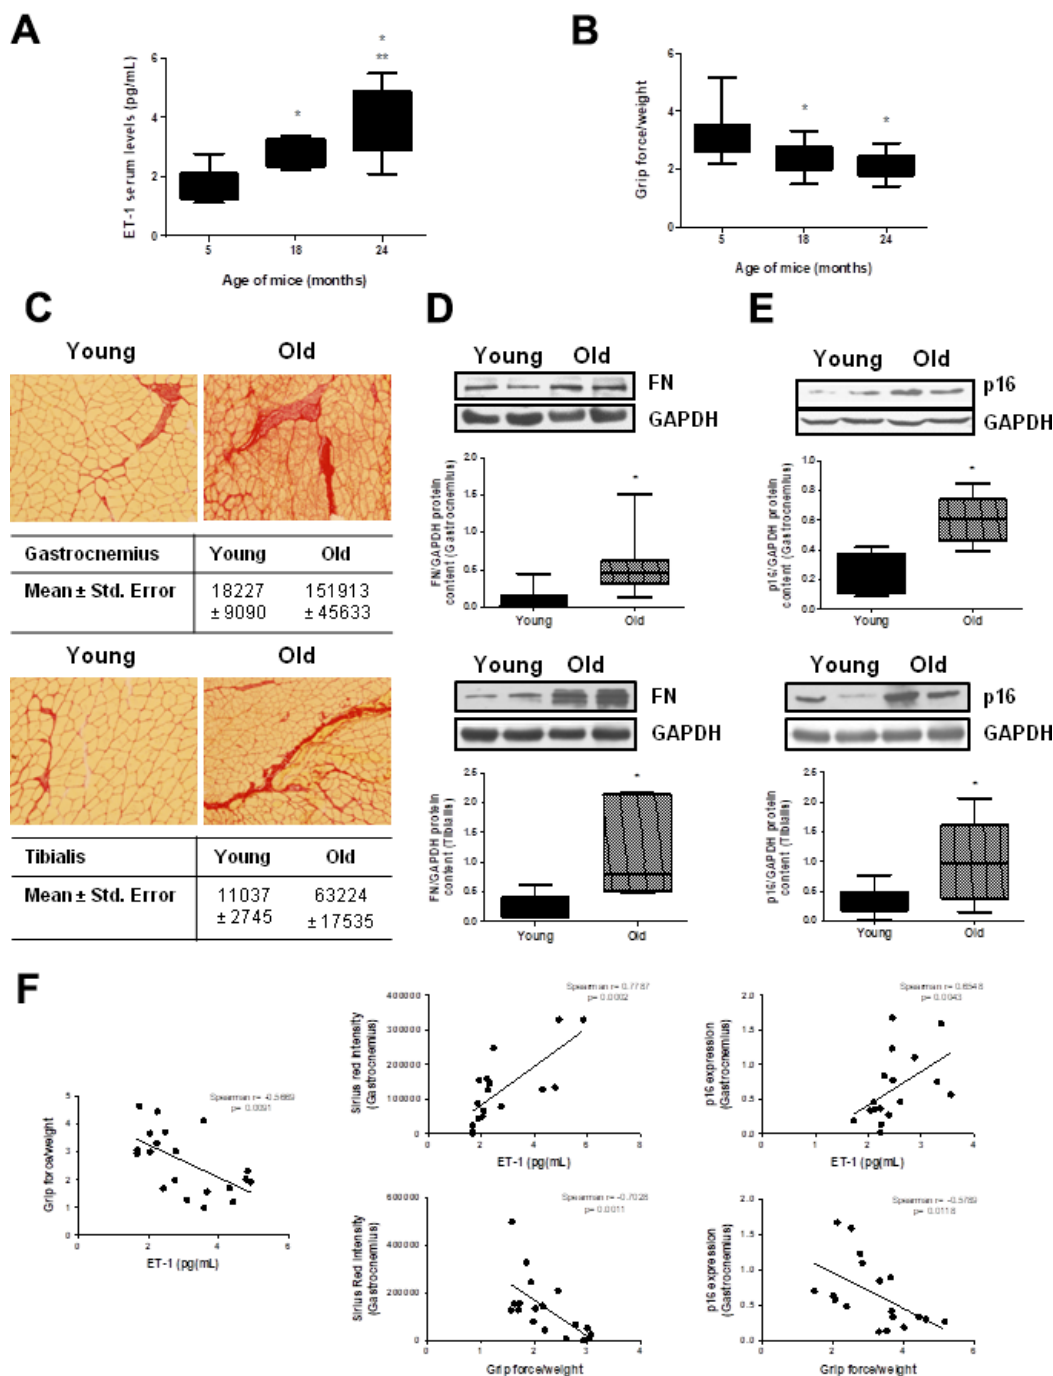

**Figure 7. Aging mice present high circulating ET-1 levels, loss of muscle strength, fibrosis and senescence in gastrocnemius and tibialis anterior muscles.** Animals were kept on a 12:12h light-dark cycle, at 24°C, and food and water were available ad libitum. Male C57Bl6 mice from 5, 18, and 24 month-old were used, 10 animals per group. **(A)** Serum ET-1 levels was measured by ELISA. **(B)** Muscle force was registered using the 4 limb grip test and data were corrected by body weight of each mouse. Values are the mean±SEM of 10 mice, \* $p < 0.05$  vs. 5-month-old; \*\* $p < 0.05$  vs 18 month-old. Mice of 5-month-old (Young-closed bars) and 24-month-old (Old-stripped bars) were used to measure Sirius red staining in sections of the gastrocnemius (GNM) and the tibialis anterior muscles to visualize fibrosis **(C)**, to analyze FN protein expression by Western blot **(D)** and to assess senescence by measuring p16 protein content by Western blot **(E)** in those muscles of the same mice. **(C)** Sirius red staining (20x) is shown with the mean ± standard error below pictures. **(D, E)** A representative Western blot was shown above with the densitometric analysis below. Values are the mean±SEM of 20 mice, \* $p < 0.05$  vs. young mice. **(F)** Graphs of correlations based on data from young (5-month-old) and old (24-month-old) mice were shown: ET-1 levels and grip force (Spearman  $r = -0.5669$ ,  $p = 0.0091$ ), ET-1 levels and Sirius red in GNM (Spearman  $r = 0.7787$ ,  $p = 0.0002$ ), ET-1 levels and p16 expression in GNM (Spearman  $r = 0.6548$ ,  $p = 0.0043$ ), grip force and Sirius red in GNM (Spearman  $r = -0.7028$ ,  $p = 0.0011$ ) and grip force and p16 expression in GNM (Spearman  $r = -0.5789$ ,  $p = 0.0118$ ).

Present results point to significance role of ET-1 in the regulation of pathophysiological processes related with aging such as fibrosis, senescence and decline of force, which could be involved in the development of sarcopenia. A proposal mechanism of action of ET-1 on muscular fibrosis and senescence is shown in Figure 8.

## DISCUSSION

Aging is characterized by the progressive loss of function in different tissues which can provoke, among others, endothelial dysfunction, with increased ET-1 synthesis, ECM accumulation in different tissues, and

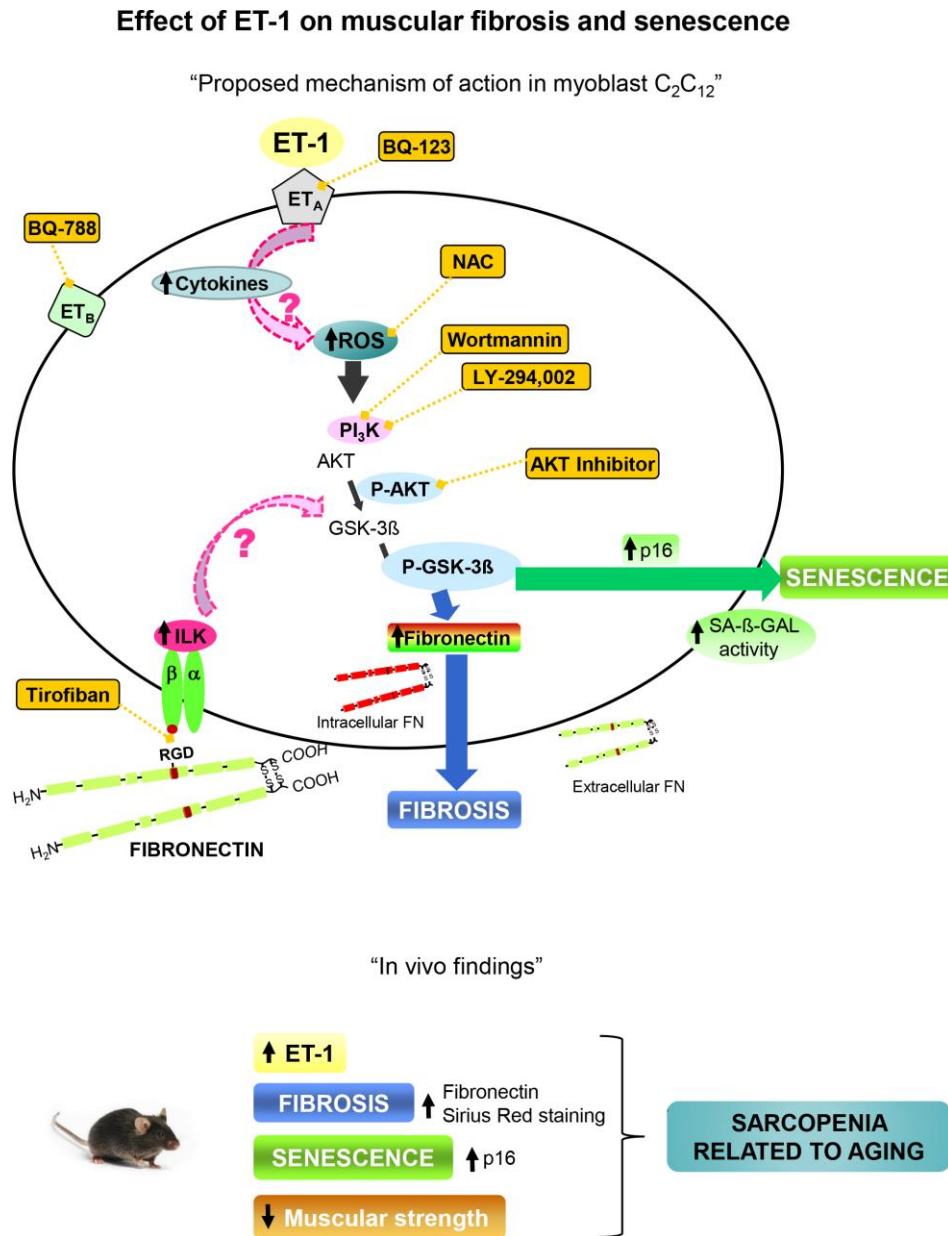

**Figure 8. Proposal mechanism of action of ET-1 on muscular fibrosis and senescence.** Myoblast cells present both type of ET-1 receptors, ET<sub>A</sub> and ET<sub>B</sub>, which are inhibited by specific antagonists such as BQ123 and BQ788, respectively. The binding of ET-1 to ET<sub>A</sub> receptor induces fibrosis and senescence through ROS production by activation of PI<sub>3</sub>K-AKT-GSK pathway. The inflammation induced by ET-1 could be also implied. Several antagonists were used to inhibit both, ROS production with the antioxidant N-acetylcysteine (NAC), and the PI<sub>3</sub>K-AKT-GSK pathway with AKT inhibitor, LY-294,002 and Wortmannin, to check the mechanism. Fibronectin could induce senescence through integrin receptor activation by joining to RGD sequence, and then trigger some downstream pathways through ILK activation. Tirofiban blocks the joining of FN to RGD sequence. Findings in aged mice are showed below which are similar to those found in myoblast cells induced by ET-1, suggesting that the appearance of fibrosis and senescence could be involved in the genesis of sarcopenia related to aging. Note: all antagonists or inhibitors are represented in an orange box and unexplored mechanisms with an arrow with dashed pink line.

sarcopenia. ET-1 has been associated to the development of fibrosis in different cell and tissue contexts [22, 24, 27, 29], even it can induce cellular senescence in human endothelial cells [28], but the role of ET-1 in skeletal muscle aging has never been described before. For this reason, we decided to study its effects on cultured muscle cells using a well-described experimental cellular model; mouse myoblast C<sub>2</sub>C<sub>12</sub> cells [30]. We analyzed the effect of ET-1 on some of the best studied aging-related aspects of myoblast biology, in particular on cellular senescence and ECM protein synthesis, since aging is associated with reductions in both muscle stem cell function and muscle regeneration potential, and with increased muscular fibrosis [4, 31].

ET-1 receptors are expressed in many organs and tissues, even they were described in C<sub>2</sub>C<sub>12</sub> cells by Tsui et al. [32]. According with that, we found both types of receptors, ET<sub>A</sub> and ET<sub>B</sub>, in skeletal muscle and in muscle tissues, which were analyzed by Western blot and by qPCR. C<sub>2</sub>C<sub>12</sub> expressed both types of receptors, ET<sub>A</sub> and ET<sub>B</sub>, with the ET<sub>A</sub> being the predominant one. In contrast, the ET<sub>B</sub> was the predominant receptor on endothelial cells. Besides ET<sub>A</sub> receptor has been preferentially involved in the pro-fibrotic effects of ET-1 [33].

We have previously described that cultured myoblast undergo cellular senescence after exposition to high extracellular phosphate concentration, compromising the regenerative capacity of the muscle [19]. In addition, hyperphosphatemia, which dramatically affects the behavior of vascular cells [34], increases ECE-1 activity in endothelial cells, which induces the synthesis of ET-1 and also senescence in endothelial cells [28]. The role of ET-1 on cellular senescence has not been previously evaluated in other cellular types out of blood vessels, but now, we hereby confirm that ET-1 also induced senescence in myoblasts. This effect was mediated by ET<sub>A</sub> receptor because the use of a specific ET<sub>A</sub> receptor antagonist (BQ123) or the unspecific dual ET<sub>A/B</sub> receptor antagonist (Bosentan) blocked the effect, whereas the use of a specific ET<sub>B</sub> receptor antagonist (BQ788) did not modify ET-1 effect on senescence. Cell senescence was analyzed by p16 protein expression and SA-β-GAL activity as previously described [35], without changing in p53 protein expression (data not shown). The senescence of myoblast has been associated with muscular dystrophy and with premature muscle wasting occurring in Bmi1 deficient young mice [36]. Senescence induced by ET-1 at vascular level has been involved in some pathologies [37], such as diabetes [38], varicosity [39] and thrombosis [40]. So, senescence induced by ET-1 at muscle level could be implicated in the development of fibrosis, exacerbating muscle damage, as the regenerative potential of skeletal muscle

declines with age and this impairment is associated with an increase in tissue fibrosis [4, 31]. Brack et al. showed that muscle stem cells (satellite cells) from aged mice tend to convert from a myogenic to a fibrogenic lineage as they begin to proliferate and increase tissue fibrosis [4]. In fact, myoblast cells under ET-1 treatment increased significantly FN expression in an ET<sub>A</sub> receptor-dependent way.

Interestingly, it is the first time that the potential role of FN on ET-1-induced senescence has been demonstrated. FN itself was able to induce mouse myoblast senescence and Tirofiban, an integrin αIIbβ3 antagonist [41] which blocks the Arg-Gly-Asp (RGD)-enriched fragment of FN, prevented cell senescence induced by both ET-1 and FN. This result suggests that FN can be mediating the effect of ET-1 on myoblast senescence through integrin activation, by an unknown mechanism which needs more studies. According with us, some authors suggested that the integrin signaling can contribute not only to senescence but also fibrosis effects, for instance, cellular senescence caused by deficiency of retinoic acid inducible gene-I (Rig-I) through amplifying integrin β3/p38 MAPK signaling [42]; and bleomycin-induced fibrosis initiated through integrin activation and imbalance in the redox state of the cell [43].

In this regard, we analyzed ILK, a well-known protein linked to integrin activity. Likewise, when ILK was silenced in C<sub>2</sub>C<sub>12</sub>, FN did not increase p16 expression, suggesting that ILK activation might be implied in the senescence induced by FN. Briefly, the mechanism could involve the integrin/ILK activation through extracellular FN which could activate some downstream signaling pathway such as p38/ErK/MAPK or even PI<sub>3</sub>K-AKT-GSKβ [42–45], causing senescence. However, further studies to evaluate the underlying mechanism behind FN-induced senescence are needed.

To study the mechanisms involved in ET-1 effects on fibrosis and senescence of myoblast; ROS production and PI<sub>3</sub>K/AKT/GSK pathway activation were evaluated. In sarcopenia, an increase in mitochondrial ROS production together with impaired mitochondrial function and oxidative damage [46] has been described. As in other aging-related conditions [28, 47], higher levels of ROS seem to be involved in ET-1-induced myoblast senescence because the effect disappeared in the presence of NAC. NAC is an antioxidant that acts replenishing intracellular cysteine levels, which are essential for glutathione formation, responsible for detoxify hydrogen peroxide [48]. Furthermore, NAC also prevented FN expression induced by ET-1 treatment. Present results suggest that ROS production induced by ET-1 mediated fibrosis and senescence found in mouse myoblast cells.

Taking to account that fibrosis is often the consequence of inflammation and inflammation is known to trigger senescence in cells and tissues, our results suggest that the inflammation induced by ET-1 could trigger fibrosis through activation of ROS production and the induction of PI<sub>3</sub>K/AKT pathway, as well as, the senescence found in myoblasts.

Next, as it has been reported that ET-1 induces PI<sub>3</sub>K/AKT pathway, which is responsible for inhibiting fibroblast apoptosis [49], protecting ovarian carcinoma cells against paclitaxel-induced apoptosis [50], or even regulating ET-1-induced fibroblast differentiation and contraction [29], we investigated the role of PI<sub>3</sub>K/AKT/GSK pathway activation by ET-1 in the regulation of FN expression and in the activation of senescence. ET-1 induces phosphorylation of AKT and GSK, suggesting that ET-1 activates PI<sub>3</sub>K/AKT/GSK pathway, like other authors have reported [29, 49]. PI<sub>3</sub>K/AKT/GSK activation depends on ET<sub>A</sub> receptor because it was completely blocked by the specific ET<sub>A</sub> receptor antagonist BQ123 but not by the ET<sub>B</sub> receptor antagonist BQ788. FN expression depends on this pathway as specific inhibitors of PI<sub>3</sub>K/AKT/GSK signaling were able to block ET-1 effect. Furthermore, the activation of senescence induced by ET-1 was also blocked in the presence of these inhibitors. Finally, we confirmed that ROS production was involved in the activation of PI<sub>3</sub>K/AKT pathway, as the use of NAC completely blocked the phosphorylation of AKT and GSK induced by ET-1.

To stress the *in vivo* relevance of these results, we study the potential relationship between ET-1, muscular fibrosis, senescence and the decline in muscle force in old mice. In a previous work, we described that concentration of ET-1 in serum was elevated in 20-month-old mice [28] as a consequence of an increased expression of endothelin-converting enzyme-1 (ECE-1) in aorta. Now, we have performed a more exhaustive analysis by measuring ET-1 levels in serum from mice at different ages: 5, 18 and 24 months old. In fact, ET-1 was progressively increasing with advanced age, reaching the maximum peak at 24 months. Elevated circulating level of ET-1 has also been reported in aged humans and activation of ET-1 system has been related to aging-associated diseases, such as diabetes, atherosclerosis, hypertension and cancer [51]. Moreover, experimental models of premature aging, such as the telomerase-deficient mice, have shown increased circulating ET-1 as a result of the increment in ECE-1 expression [52]. However, there have been no studies demonstrating the role of ET-1 in the aging of skeletal muscle so far.

Together with circulating ET-1, muscle strength was evaluated in the same mice, finding a significant

reduction in the muscle force when the mice's age was advancing. Interestingly, those mice that had higher levels of ET-1 had less muscle strength, suggesting a relationship between both of them. ET-1 is one of the best known pro-fibrotic factors and aging-associated changes in muscle structure include the appearance of fibrotic areas between the fibers, which can be directly involved in the decline of muscular function [53]. We found that muscles isolated from old mice (24-month-old) showed larger fibrotic areas than those isolated from young mice (5-month-old) assessed by Sirius red staining, which stains mainly collagen fibers. Furthermore, FN protein expression was also evaluated in the gastrocnemius and tibialis anterior muscles from those mice, finding an increase in old mice compared with young mice. Both FN and collagen are considered proteins of ECM, which can be accumulated in muscle causing fibrosis. Again, we checked whether those mice with more muscular fibrosis had a minor muscular strength and a higher concentration of ET-1 in serum, since the intensity of Sirius red staining was negatively correlated with muscle force and positively correlated with circulating ET-1. In addition, p16 protein expression was assessed by western blot in the same muscles from those mice, finding also an increased expression of p16 in old mice compared to young ones.

Baker et al. confirmed the role of senescent cells in some aged-related diseases [54, 55], where the presence of senescent cells within a tissue was related to the loss of function, and treatment lead to remove senescent cells from tissues improved the organ function. However, they did not confirm whether muscle function was also improved with that treatment. In this sense, we found a negative correlation between grip test and p16 expression in mice, suggesting that the presence of senescence cells in gastrocnemius are linked to loss of strength. These results allow us to hypothesize that circulating ET-1 is increased with age and reaches skeletal muscle cells, where it can promote fibrosis and senescence determining the loss of muscular strength characteristic of aging. In this sense, some authors found a link between ET-1 and aging-related cardiac fibrosis; Wang et al. demonstrated that ET-1 increased FN and collagen expression in cardiac fibroblast, and hearts from old mice showed cardiac fibrosis with upregulation of ET-1 [26]. Meyer et al. observed that aging increased mRNA myocardial expression of ECE-1 and ET receptors in mice, which could be associated with heart failure, fibrosis and left ventricular hypertrophy [56]. According to this data, the fibrosis we found in the gastrocnemius and tibialis anterior muscles from old mice could explain at least in part the reduction in muscle force. Raz et al. suggested that chronic age-associated muscle degeneration was associated with higher fibrosis in muscle [31] and the relationship between muscular

fibrosis and loss of strength has also been described in several muscular dystrophies [57]. With respect to senescence increased in old mice, previous results from our group [19, 45] are in agreement, as they found that old mice had high levels of serum phosphate linked to increased expression of ILK and senescence genes.

In summary, we demonstrated that ET-1-induced senescence and fibrosis in cultured mouse myoblast cells depends on the increase of extracellular FN, that interacting with integrin receptor, induces ILK expression, ROS production and activation of PI<sub>3</sub>K-AKT-GSK pathway. Also, we provided solid evidences for the *in vivo* relevance of these results since aged mice showed not only a higher expression of FN and p16 in the gastrocnemius and tibialis anterior muscles but also high levels of serum ET-1, which are negatively correlated with muscle force and positively correlated with Sirius red staining. High ET-1 levels related to aging could increase senescent cells and muscular fibrosis, which could be involved in impairing muscle function decline. We hereby propose that levels of circulating ET-1 increase with age, contributing to the appearance of fibrosis and senescence in the gastrocnemius and tibialis anterior muscles, which could promote the loss muscular strength related to aging.

## MATERIALS AND METHODS

### Materials

Culture plates, culture media, blueStar-prestained protein marker, BCA protein assay reagent, nitrocellulose membrane, secondary horseradish peroxidase-conjugated goat anti-mouse IgG, CL-Xposure films were from Cultek (Thermo Fisher Scientific brand, Madrid, Spain), and Supersignal West Pico detection system was from Pierce (Thermo Fisher Scientific brand, Madrid, Spain). The ET-1 ELISA system was from Immuno-Biological Laboratories (IBL Co., Japan). Rabbit polyclonal anti-Fibronectin antibody (ab6584), rabbit monoclonal anti-p16 antibody (ab51243) and Picro Sirius Red Stain kit (ab150681) were from Abcam (Cambridge, UK). Rabbit phospho-AKT (Ser473) antibody (9271), rabbit AKT antibody (9272), rabbit phospho-GSK-3 $\beta$  (Ser9) antibody (9336), rabbit GSK-3 $\beta$  antibody (9315) and rabbit ILK antibody (3862) were from Cell Signaling (IZASA, Barcelona, Spain). Rabbit antibodies against ET receptors ET<sub>A</sub> (anti-Ednra-MBS243959) and ET<sub>B</sub> (anti-Ednrb-MBS2523107) were from MyBioSource (San Diego, CA, USA). Acrylamide-bisacrylamide was from Hispanlab-Pronadisa (Madrid, Spain). Electrophoresis equipment was from Bio-Rad Laboratories (Richmond, CA, USA). The fluorogenic ImaGene green C<sub>12</sub>FDG substrate reagent and CellROX deep red probe for oxidative stress detection were from Molecular Probes

(Thermo Fisher Scientific brand, Madrid, Spain). Trizol reagent and RNA later solution was from Ambion-Life technologies (Thermo Fisher Scientific brand, Madrid, Spain). Protease inhibitor cocktail tablets and FastStart universal probe master were from Roche Diagnostics S.L. (Barcelona, Spain). High capacity cDNA reverse transcription kit and TaqMan gene expression assays from mouse were purchased from Applied Biosystems (Thermo Fisher Scientific brand, Madrid, Spain). AKT inhibitor II was from Merck Millipore (BioNova científica, Madrid, Spain). Tirofiban hydrochloride (Agrastat) was from Correvio Spain S.L.U. (Madrid, Spain). Human ET-1, Fibronectin 0.1% solution, antagonists from endothelin receptors such as BQ123 for ET<sub>A</sub>, BQ788 for ET<sub>B</sub>, and Bosentan hydrate for ET<sub>A</sub> and ET<sub>B</sub>, antagonist from phosphatidylinositol 3-kinase (PI<sub>3</sub>K), such as LY-294,002 hydrochloride (LY) and Wortmannin (WTN), as well as the rest of drugs, antibodies and reagents (unless otherwise indicated) were from Sigma-Aldrich-Fluka Chemical Co. (St. Louis, MO, USA).

### Cell culture

C<sub>2</sub>C<sub>12</sub>, a mouse myoblast cell line, was purchase from American Type Culture Collection (Manassas, VA, USA). Cells were grown in Dulbecco's Modified Eagle Media (DMEM) containing 4.5 g/L glucose and supplemented with 10% fetal bovine serum, 100 U/mL penicillin and 100  $\mu$ g/mL streptomycin in an atmosphere of 95% air and 5% CO<sub>2</sub>. Cells were used always at passages under 15.

### Experimental design

To determine whether ET-1 induces senescence and fibrosis in C<sub>2</sub>C<sub>12</sub>, cells were incubated with 1 nM ET-1 at different times. The choice of ET-1 dose was based on previous works [58]. To study the mechanisms implied, we used several antagonists: 1) To block endothelin receptors a dual ET<sub>A/B</sub> receptor antagonist (Bosentan, 10  $\mu$ M), a specific ET<sub>A</sub> receptor antagonist (BQ123, 100 nM) or a specific ET<sub>B</sub> receptor antagonist (BQ788, 100 nM) were used. 2) To block ROS production the antioxidant N-acetylcysteine (NAC, 100  $\mu$ M) was used. 3) To block PI<sub>3</sub>K-AKT-GSK pathway we used wortmannin (WTN, 10  $\mu$ M) and LY-294,002 hydrochloride (LY, 50  $\mu$ M), which block phosphatidylinositol 3-kinase (PI<sub>3</sub>K) preventing phosphorylation and activation of AKT; and also the AKT inhibitor (I-AKT, 30  $\mu$ M), which blocks phosphorylation of GSK-3 $\beta$ .

### Animal studies

Male C57BL6 mice from different ages: 5 (n=20), 18 (n=10), and 24 (n=20) month-old were obtained from

Janvier Laboratories. Animals were kept on a 12:12h light-dark cycle, at 24°C, and food and water were available ad libitum. Mice were anesthetized and blood samples were collected by heart puncture exsanguinations. The gastrocnemius and the tibialis anterior muscles were isolated, one part was conserved in RNA later solution for protein extraction and other part was frozen on OCT to histological studies. Serum ET-1 was measured by enzyme-linked immunosorbent assay (ET-1 ELISA) according to the kit instructions (IBL Co.) using a 96-well microplate reader.

### **Grip strength test**

To measure 4 limb grip strength, we used a Grip Strength Meter (UGO BASILE) from PSYMTEC (Madrid, Spain). The procedure was as follows: grip strength was measured by gently pulling the mouse by the tail in a horizontal plane parallel with the base plate of the grip strength meter. The animal's grip strength was measured as peak force registered. Each mouse was tested ten times consecutively per day at one-minute intervals, with the maximum grip strength used in analyses. The order of mice tested by this test was randomized. All investigators were blinded to all results. Test sessions were performed during the afternoon hours of the light cycle (11 AM to 2 PM).

### **Sirius red staining**

Gastrocnemius and tibialis anterior muscles were frozen immediately on OCT after being isolated. Tissues were cut and stored at -80°C until the assay was performed. Tissues were stained using the Picro Sirius Red Stain kit according to the manufacture instructions for 10 min. After that, they were dehydrated and mounted with DPX solution to be observed with a microscope. Pictures were obtained with 20x magnification and Sirius red intensity was measured using Image Pro Plus software (<http://www.mediacy.com/imageproplus>).

### **Western blot assays**

Proteins were obtained from cells or mice muscles by using the Lysis Buffer (20 mM Tris-HCl pH 7.5, 150 mM NaCl, 1 mM EGTA, 1 mM EDTA, 0.1 % sodium deoxycholate, 1 % Triton X-100, 10 mM sodium pyrophosphate) containing a protease inhibitor cocktail. The resulting solution was spun at 13,000 rpm for 30 min at 4°C. Protein concentration was determined with BioRad protein assay kit. Equal amounts of protein (30 µg protein/lane) from each sample were separated on SDS-polyacrylamide gels (PAGE) under reducing conditions and transferred onto nitrocellulose membranes. Membranes were blocked with 5% (w/v) non-fat dry milk in Tween Tris buffered saline (TTBS)

(20 mM Tris-HCl pH 7.5, 0.9% NaCl, 0.05% Tween 20) for 1h at room temperature (R/T), and then incubated with different specific antibodies for FN or p16 detection. Rabbit monoclonal anti-p16 antibody was incubated for O/N at 4°C (1:1000 dilution in TTBS with 3% BSA), and rabbit polyclonal anti-FN was incubated for 1h at R/T (1:1000 dilution in TTBS with 0.05% BSA). After washing in TTBS, blots were incubated for 1h at R/T with horseradish peroxidase-conjugated goat anti-rabbit IgG (10,000-fold diluted for FN and p16), as secondary antibody. The immunoreactive bands were visualized with the SuperSignal West Pico detection system after 30 sec of exposure to CL-Xposure films. Then, blots were reblotted with a rabbit anti-actin antibody in order to normalize FN or p16 levels in cells, or mouse anti-GAPDH antibody in mice.

Similar experiments were performed in myoblasts to study whether the ET-1 effect on fibrosis was mediated by activation of PI<sub>3</sub>Kinase-AKT-GSK pathway. Proteins were separated on 6% SDS-PAGE and phosphorylation of AKT and GSK were detected by immunoblot using antibodies against P-AKT or P-GSK-3β, comparing these changes with total AKT and total GSK expression. Blots were incubated 2h at R/T with 1:1000 dilution of each antibody in TTBS with 0.05% BSA. After washing in TTBS, blots were incubated for 1h at R/T with 1/10,000 horseradish peroxidase-conjugated goat anti-rabbit IgG. The immunoreactive bands were visualized with the SuperSignal West Pico detection system after 30 sec of exposure to MXB film. Then, blots were reblotted with a rabbit anti-actin antibody in order to normalize P-AKT and P-GSK levels.

To test ET<sub>A</sub> or ET<sub>B</sub> receptor expression in C<sub>2</sub>C<sub>12</sub>, we compared its expression with the one in endothelial cells, using two specific anti-rabbit antibodies by Western blot, which were incubated 2h at R/T with 1:1000 dilution. Then, blots were normalized using actin antibody.

### **Detection of senescence-associated β-galactosidase activity by fluorescence confocal microscopy**

C<sub>2</sub>C<sub>12</sub> myoblast cells were grown in microscope cover glasses and after 24h of free-serum DMEM, they were treated with 1 nM ET-1 at different times, in the presence or not of different antagonists. In some cases, cells were also treated with 2.5 µg/ml FN at different times. To determine cellular senescence, senescence-associated β-galactosidase (SA-β-GAL) activity was measured by fluorescence confocal microscopy, using the fluorogenic substrate C<sub>12</sub>FDG [35]. After treatments, 33 µM C<sub>12</sub>FDG was added and incubated for 2h. At the end of incubation, cells were washed twice with PBS,

and fixed with 4% para-formaldehyde for 15 min. Subsequently, cells were washed again and mounted in ProLong® Gold antifade reagent with DAPI overnight. Samples were analyzed using LEICA TCS-SP5 confocal microscope (Leica Microsystems; GmbH, Mannheim, Germany) at 488 nm argon laser to detect green fluorescence of SA- $\beta$ -GAL activity and at 405 nm to detect DAPI. Pictures were obtained and fluorescence intensity was measured by densitometry by Image J software (<http://rsbweb.nih.gov/ij/>).

### Quantitative RT-PCR

Total RNA from C<sub>2</sub>C<sub>12</sub> myoblast cells were isolated using Trizol reagents according to the manufacturer's protocol. cDNA was synthesized using a High Capacity cDNA reverse transcription kit [28], and FN and  $\beta$ -Actin expression were measured by quantitative PCR (ABI Prism 7500 Fast Real-Time PCR System) and analyzed with 7500 Fast sequence detection software v1.3.1 (Applied Biosystems Inc., Foster City, CA, USA), using Taqman genes and Double delta Ct method. Taqman genes: FN (Mm01256744\_m1), and the endogenous control beta-Actin (Mm61205647\_g1) were used.

To test ET<sub>A</sub> or ET<sub>B</sub> receptor expression in C<sub>2</sub>C<sub>12</sub>, we compared its expression with the one in endothelial cells, using two specific Taqman genes: ET<sub>A</sub> receptor (Mm01243722\_m1, Ednra), ET<sub>B</sub> receptor (Mm00432989\_m1, Ednrb). To test pro-inflammatory cytokines expression in C<sub>2</sub>C<sub>12</sub>, we used the specific Taqman genes: IL-6 (Mm00446190\_m1, Il6), TNF- $\alpha$  (Mm00443258\_m1, Tnf) and MCP-1 (Mm00441242\_m1, Ccl2).

### Cellular localization of FN by immunofluorescence

Cells were grown on cover slips for 24h. ET-1 was added in the presence or in the absence of different antagonists. After being washed twice, cells were fixed with 4% p-formaldehyde for 10 min at R/T, then 0.5% Triton X-100 was added and incubated for 10 min at R/T. After that, cells were blocked with 5% BSA for 1h at R/T, and then incubated overnight at 4°C with mouse anti-FN (1:100). After being washed in PBS, cells were incubated with 200-fold diluted goat anti-mouse IgG labeled with Alexa Fluor 647. Cover slips were mounted in Prolong Gold antifade reagent with DAPI to stain nuclei. Samples were analyzed using LEICA TCS-SP5 confocal microscope (Leica Microsystems; GmbH, Mannheim, Germany) at 633 nm helium-neon laser to detect red fluorescence of FN antibody and at 405 nm to detect DAPI. Pictures were obtained and fluorescence intensity was measured by densitometry by Image J software (<http://rsbweb.nih.gov/ij/>).

### ROS production

C<sub>2</sub>C<sub>12</sub> myoblast cells were grown in 60 $\mu$ -dishes (35mm high) with glass bottom (Ibidi, Martinsried, Munich, Germany) and after 24h of free-serum DMEM, cells were treated at different times with ET-1 in the presence or not of the antioxidant NAC. ROS production was measured by fluorescence confocal microscopy, using the CellROX Deep Red probe. After ET-1 treatment, 5  $\mu$ M CellROX was added and incubated for the last 30 min. At the end of incubation, cells were washed twice with PBS, and fixed with 4% para-formaldehyde for 15 min. Cells were analyzed using LEICA TCS-SP5 confocal microscope (Leica Microsystems; Wetzlar, Germany) at 633 nm helium-neon laser to detect red fluorescence of CellROX probe. Pictures were obtained and fluorescence intensity was measured by densitometry by Image J software (<http://rsbweb.nih.gov/ij/>).

### Transfection of siRNA against ILK

C<sub>2</sub>C<sub>12</sub> myoblast cells were grown until they reached 60-80 % confluent. After that, siRNA against ILK or scrambled control from Santa Cruz Biotechnologies (Quimigen, Madrid, Spain) were transfected using Lipofectamin 2000 for 16h in OptiMEM medium at 37°C. Cells were washed twice with PBS before growing in DMEM with serum for 24h. After that, 2.5  $\mu$ g/ml FN was added for 48h to assess p16 expression after checking the silencing of ILK by western blot.

### Statistical analysis

GraphPad Prism 5 Software was used for statistical analysis. The following statistical tests were applied in cells experiments: one-way ANOVA followed by Dunnett's post-tests for experiments compared with control cells, or followed by Bonferroni post-tests for multiple comparisons. Statistical tests applied in experiments performed on animals were: one-way ANOVA followed by Bonferroni post-tests for multiple comparisons, and t-test followed by unpaired t test with Welch's correction for two groups comparisons. Correlations were analyzed using the non-parametric test Spearman correlation. Unless otherwise specified, data are expressed as the mean  $\pm$  standard error, and expressed as a percentage of the control values of a variable number of experiments detailed in figure legends. The level of statistical significance was defined as  $p < 0.05$ .

### Ethical statement

The study design and the animal experimental protocols were performed in agreement with the Guide for the Care and Use of Laboratory Animals published by the



US National Institute of Health (NIH Publication No.85-23, revised 1996) and with the European Union regulations (EU Directive 2010/63/EU). The study was revised and approved in accordance with the Ethics Committee from Alcala University (Madrid, Spain). Animal works were taken in the breeding place of Alcala University.

## Abbreviations

AKT: tyrosine kinase B; C<sub>2</sub>C<sub>12</sub>: mouse myoblast cell line; ECE-1: endothelin-converting enzyme-1; ECM: extracellular matrix; ET-1: endothelin-1; FN: fibronectin; GSK: glycogen synthase kinase 3 $\beta$ ; h: hour; ILK: integrin linked kinase; min: minute; NAC: N-acetylcysteine; PI<sub>3</sub>K: phosphoinositide 3 kinase; ROS: reactive oxygen species; SA- $\beta$ -GAL: senescence-associated  $\beta$ -galactosidase.

## AUTHOR CONTRIBUTIONS

M.P. Ruíz-Torres and S. López-Ongil designed research; E. Alcalde-Estévez, A. Asenjo-Bueno, P. Sosa, M.A. Caballero-Mora and P. Plaza performed research; E. Alcalde-Estévez, A. Asenjo-Bueno and S. López-Ongil analyzed data; G. Olmos, M.P. Ruíz-Torres and S. López-Ongil wrote the paper that was revised by D. Rodríguez-Puyol. All authors have read and approved the final version of the manuscript.

## ACKNOWLEDGMENTS

ROS production, FN cellular localization and SA- $\beta$ -GAL activity were developed using a Leica SP5 confocal microscope (Leica Microsystems, Wetzlar, Germany), through the Confocal Microscopy Service (ICTS 'NANBIOSIS' U17) of the Biomedical Research Networking Centre on Bioengineering, Biomaterials and Nanomedicine (CIBER-BBN at the Alcalá University, Madrid, Spain).

## CONFLICTS OF INTEREST

All authors declare that they have no conflicts of interest.

## FUNDING

This work was supported by grants from the Fondo de Investigaciones Sanitarias from Instituto de Salud Carlos III (grants: PI19/00502; PI16/02082; PI16/01619, PI17/01513), grant from Comunidad de Madrid NOVELREN-CM (grant B2017/BMD-3751), Networks Program REDinREN from Instituto de Salud Carlos III (grant RETIC REDinREN: RD016/

0009/0018) and FEDER funds, IRYCIS group 3.07 and FRIAT.

Elena Alcalde-Estévez holds a predoctoral contract from Ministerio de Educación, cultura y deportes (FPU16/01450), Ana Asenjo-Bueno and Patricia Plaza hold contracts from Programa de Garantía Juvenil of CAM as predoctoral fellow (PEJ-2018-PRE/BMD-8289) and as technician (PEJ-2017-TL/BMD-5956), respectively, Patricia Sosa holds a predoctoral contract from Alcala University (FPI16-UAH), and Susana López-Ongil holds a contract from the Research Stabilization program from Instituto de Salud Carlos III (CES07/032).

## REFERENCES

1. Rolland Y, Czerwinski S, Abellan Van Kan G, Morley JE, Cesari M, Onder G, Woo J, Baumgartner R, Pillard F, Boirie Y, Chumlea WM, Vellas B. Sarcopenia: its assessment, etiology, pathogenesis, consequences and future perspectives. *J Nutr Health Aging*. 2008; 12:433–50.  
<https://doi.org/10.1007/BF02982704>  
PMID:[18615225](https://pubmed.ncbi.nlm.nih.gov/18615225/)
2. Nair KS. Aging muscle. *Am J Clin Nutr*. 2005; 81:953–63.  
<https://doi.org/10.1093/ajcn/81.5.953>  
PMID:[15883415](https://pubmed.ncbi.nlm.nih.gov/15883415/)
3. Sousa-Victor P, Muñoz-Cánoves P. Regenerative decline of stem cells in sarcopenia. *Mol Aspects Med*. 2016; 50:109–17.  
<https://doi.org/10.1016/j.mam.2016.02.002>  
PMID:[26921790](https://pubmed.ncbi.nlm.nih.gov/26921790/)
4. Brack AS, Conboy MJ, Roy S, Lee M, Kuo CJ, Keller C, Rando TA. Increased Wnt signaling during aging alters muscle stem cell fate and increases fibrosis. *Science*. 2007; 317:807–10.  
<https://doi.org/10.1126/science.1144090>  
PMID:[17690295](https://pubmed.ncbi.nlm.nih.gov/17690295/)
5. Wynn TA. Cellular and molecular mechanisms of fibrosis. *J Pathol*. 2008; 214:199–210.  
<https://doi.org/10.1002/path.2277> PMID:[18161745](https://pubmed.ncbi.nlm.nih.gov/18161745/)
6. Zeisberg M, Kalluri R. Cellular mechanisms of tissue fibrosis. 1. Common and organ-specific mechanisms associated with tissue fibrosis. *Am J Physiol Cell Physiol*. 2013; 304:C216–25.  
<https://doi.org/10.1152/ajpcell.00328.2012>  
PMID:[23255577](https://pubmed.ncbi.nlm.nih.gov/23255577/)
7. Collins KH, Herzog W, MacDonald GZ, Reimer RA, Rios JL, Smith IC, Zernicke RF, Hart DA. Obesity, metabolic syndrome, and musculoskeletal disease: common inflammatory pathways suggest a central role for loss of muscle integrity. *Front Physiol*. 2018; 9:112.

- <https://doi.org/10.3389/fphys.2018.00112>  
PMID:[29527173](https://pubmed.ncbi.nlm.nih.gov/29527173/)
8. Klingler W, Jurkat-Rott K, Lehmann-Horn F, Schleip R. The role of fibrosis in duchenne muscular dystrophy. *Acta Myol.* 2012; 31:184–95.  
PMID:[23620650](https://pubmed.ncbi.nlm.nih.gov/23620650/)
  9. Archile-Contreras AC, Mandell IB, Purslow PP. Phenotypic differences in matrix metalloproteinase 2 activity between fibroblasts from 3 bovine muscles. *J Anim Sci.* 2010; 88:4006–15.  
<https://doi.org/10.2527/jas.2010-3060>  
PMID:[20802142](https://pubmed.ncbi.nlm.nih.gov/20802142/)
  10. Lieber RL, Ward SR. Cellular mechanisms of tissue fibrosis. 4. Structural and functional consequences of skeletal muscle fibrosis. *Am J Physiol Cell Physiol.* 2013; 305:C241–52.  
<https://doi.org/10.1152/ajpcell.00173.2013>  
PMID:[23761627](https://pubmed.ncbi.nlm.nih.gov/23761627/)
  11. Mann CJ, Perdiguero E, Kharraz Y, Aguilar S, Pessina P, Serrano AL, Muñoz-Cánoves P. Aberrant repair and fibrosis development in skeletal muscle. *Skelet Muscle.* 2011; 1:21.  
<https://doi.org/10.1186/2044-5040-1-21>  
PMID:[21798099](https://pubmed.ncbi.nlm.nih.gov/21798099/)
  12. Stearns-Reider KM, D'Amore A, Beezhold K, Rothrauff B, Cavalli L, Wagner WR, Vorp DA, Tsamis A, Shinde S, Zhang C, Barchowsky A, Rando TA, Tuan RS, Ambrosio F. Aging of the skeletal muscle extracellular matrix drives a stem cell fibrogenic conversion. *Aging Cell.* 2017; 16:518–28.  
<https://doi.org/10.1111/accel.12578>  
PMID:[28371268](https://pubmed.ncbi.nlm.nih.gov/28371268/)
  13. Sousa-Victor P, Gutarra S, García-Prat L, Rodriguez-Ubrea J, Ortet L, Ruiz-Bonilla V, Jardí M, Ballestar E, González S, Serrano AL, Perdiguero E, Muñoz-Cánoves P. Geriatric muscle stem cells switch reversible quiescence into senescence. *Nature.* 2014; 506:316–21.  
<https://doi.org/10.1038/nature13013>  
PMID:[24522534](https://pubmed.ncbi.nlm.nih.gov/24522534/)
  14. Hayflick L, Moorhead PS. The serial cultivation of human diploid cell strains. *Exp Cell Res.* 1961; 25:585–621.  
[https://doi.org/10.1016/0014-4827\(61\)90192-6](https://doi.org/10.1016/0014-4827(61)90192-6)  
PMID:[13905658](https://pubmed.ncbi.nlm.nih.gov/13905658/)
  15. Ferbeyre G, de Stanchina E, Lin AW, Querido E, McCurrach ME, Hannon GJ, Lowe SW. Oncogenic ras and p53 cooperate to induce cellular senescence. *Mol Cell Biol.* 2002; 22:3497–508.  
<https://doi.org/10.1128/mcb.22.10.3497-3508.2002>  
PMID:[11971980](https://pubmed.ncbi.nlm.nih.gov/11971980/)
  16. Wang C, Jurk D, Maddick M, Nelson G, Martin-Ruiz C, von Zglinicki T. DNA damage response and cellular senescence in tissues of aging mice. *Aging Cell.* 2009; 8:311–23.  
<https://doi.org/10.1111/j.1474-9726.2009.00481.x>  
PMID:[19627270](https://pubmed.ncbi.nlm.nih.gov/19627270/)
  17. del Nogal M, Troyano N, Calleros L, Griera M, Rodriguez-Puyol M, Rodriguez-Puyol D, Ruiz-Torres MP. Hyperosmolarity induced by high glucose promotes senescence in human glomerular mesangial cells. *Int J Biochem Cell Biol.* 2014; 54:98–110.  
<https://doi.org/10.1016/j.biocel.2014.07.006>  
PMID:[25043688](https://pubmed.ncbi.nlm.nih.gov/25043688/)
  18. Del Nogal-Ávila M, Troyano-Suárez N, Román-García P, Cannata-Andía JB, Rodriguez-Puyol M, Rodriguez-Puyol D, Kuro-O M, Ruiz-Torres MP. Amadori products promote cellular senescence activating insulin-like growth factor-1 receptor and down-regulating the antioxidant enzyme catalase. *Int J Biochem Cell Biol.* 2013; 45:1255–64.  
<https://doi.org/10.1016/j.biocel.2013.03.018>  
PMID:[23579096](https://pubmed.ncbi.nlm.nih.gov/23579096/)
  19. Sosa P, Alcalde-Estevez E, Plaza P, Troyano N, Alonso C, Martínez-Arias L, Evelem de Melo Aroeira A, Rodriguez-Puyol D, Olmos G, López-Ongil S, Ruiz-Torres MP. Hyperphosphatemia promotes senescence of myoblasts by impairing autophagy through ilk overexpression, a possible mechanism involved in sarcopenia. *Aging Dis.* 2018; 9:769–84.  
<https://doi.org/10.14336/AD.2017.1214>  
PMID:[30271655](https://pubmed.ncbi.nlm.nih.gov/30271655/)
  20. Donato AJ, Gano LB, Eskurza I, Silver AE, Gates PE, Jablonski K, Seals DR. Vascular endothelial dysfunction with aging: endothelin-1 and endothelial nitric oxide synthase. *Am J Physiol Heart Circ Physiol.* 2009; 297:H425–32.  
<https://doi.org/10.1152/ajpheart.00689.2008>  
PMID:[19465546](https://pubmed.ncbi.nlm.nih.gov/19465546/)
  21. Davenport AP, Hyndman KA, Dhaun N, Southan C, Kohan DE, Pollock JS, Pollock DM, Webb DJ, Maguire JJ. Endothelin. *Pharmacol Rev.* 2016; 68:357–418.  
<https://doi.org/10.1124/pr.115.011833>  
PMID:[26956245](https://pubmed.ncbi.nlm.nih.gov/26956245/)
  22. Rodriguez-Vita J, Ruiz-Ortega M, Rupérez M, Esteban V, Sanchez-López E, Plaza JJ, Egido J. Endothelin-1, via ETA receptor and independently of transforming growth factor-beta, increases the connective tissue growth factor in vascular smooth muscle cells. *Circ Res.* 2005; 97:125–34.  
<https://doi.org/10.1161/01.RES.0000174614.74469.83>  
PMID:[15976312](https://pubmed.ncbi.nlm.nih.gov/15976312/)
  23. Meoli DF, White RJ. Endothelin-1 induces pulmonary but not aortic smooth muscle cell migration by activating ERK1/2 MAP kinase. *Can J Physiol Pharmacol.* 2010; 88:830–39.

- <https://doi.org/10.1139/Y10-059>  
PMID:20725141
24. Rodríguez-Pascual F, Busnadiago O, González-Santamaría J. The profibrotic role of endothelin-1: is the door still open for the treatment of fibrotic diseases? *Life Sci*. 2014; 118:156–64.  
<https://doi.org/10.1016/j.lfs.2013.12.024>  
PMID:24378671
25. Motte S, McEntee K, Naeije R. Endothelin receptor antagonists. *Pharmacol Ther*. 2006; 110:386–414.  
<https://doi.org/10.1016/j.pharmthera.2005.08.012>  
PMID:16219361
26. Wang X, Guo Z, Ding Z, Khaidakov M, Lin J, Xu Z, Sharma SG, Jiwani S, Mehta JL. Endothelin-1 upregulation mediates aging-related cardiac fibrosis. *J Mol Cell Cardiol*. 2015; 80:101–09.  
<https://doi.org/10.1016/j.yjmcc.2015.01.001>  
PMID:25584774
27. Shi-Wen X, Renzoni EA, Kennedy L, Howat S, Chen Y, Pearson JD, Bou-Gharios G, Dashwood MR, du Bois RM, Black CM, Denton CP, Abraham DJ, Leask A. Endogenous endothelin-1 signaling contributes to type I collagen and CCN2 overexpression in fibrotic fibroblasts. *Matrix Biol*. 2007; 26:625–32.  
<https://doi.org/10.1016/j.matbio.2007.06.003>  
PMID:17681742
28. Olmos G, Martínez-Miguel P, Alcalde-Estevez E, Medrano D, Sosa P, Rodríguez-Mañas L, Naves-Díaz M, Rodríguez-Puyol D, Ruiz-Torres MP, López-Ongil S. Hyperphosphatemia induces senescence in human endothelial cells by increasing endothelin-1 production. *Aging Cell*. 2017; 16:1300–12.  
<https://doi.org/10.1111/accel.12664>  
PMID:28857396
29. Shi-Wen X, Chen Y, Denton CP, Eastwood M, Renzoni EA, Bou-Gharios G, Pearson JD, Dashwood M, du Bois RM, Black CM, Leask A, Abraham DJ. Endothelin-1 promotes myofibroblast induction through the ETA receptor via a rac/phosphoinositide 3-kinase/Akt-dependent pathway and is essential for the enhanced contractile phenotype of fibrotic fibroblasts. *Mol Biol Cell*. 2004; 15:2707–19.  
<https://doi.org/10.1091/mbc.e03-12-0902>  
PMID:15047866
30. Cornelison DD. Context matters: in vivo and in vitro influences on muscle satellite cell activity. *J Cell Biochem*. 2008; 105:663–69.  
<https://doi.org/10.1002/jcb.21892>  
PMID:18759329
31. Raz Y, Henseler JF, Kolk A, Tatum Z, Groosjohan NK, Verwey NE, Arindarto W, Kielbasa SM, Nagels J, 't Hoën PA, Nelissen RG, Raz V. Molecular signatures of age-associated chronic degeneration of shoulder muscles. *Oncotarget*. 2016; 7:8513–23.  
<https://doi.org/10.18632/oncotarget.7382>  
PMID:26885755
32. Tsui JC, Shi-Wen X. Endothelin-1 in peripheral arterial disease: a potential role in muscle damage. *Pharmacol Res*. 2011; 63:473–76.  
<https://doi.org/10.1016/j.phrs.2011.02.012>  
PMID:21382494
33. Manitsopoulos N, Nikitopoulou I, Maniatis NA, Magkou C, Kotanidou A, Orfanos SE. Highly selective endothelin-1 receptor inhibition prevents bleomycin-induced pulmonary inflammation and fibrosis in mice. *Respiration*. 2018; 95:122–36.  
<https://doi.org/10.1159/000481201>  
PMID:29131071
34. Lau WL, Pai A, Moe SM, Giachelli CM. Direct effects of phosphate on vascular cell function. *Adv Chronic Kidney Dis*. 2011; 18:105–12.  
<https://doi.org/10.1053/j.ackd.2010.12.002>  
PMID:21406295
35. Debacq-Chainiaux F, Erusalimsky JD, Campisi J, Toussaint O. Protocols to detect senescence-associated beta-galactosidase (SA-beta-gal) activity, a biomarker of senescent cells in culture and in vivo. *Nat Protoc*. 2009; 4:1798–806.  
<https://doi.org/10.1038/nprot.2009.191>  
PMID:20010931
36. Kudryashova E, Kramerova I, Spencer MJ. Satellite cell senescence underlies myopathy in a mouse model of limb-girdle muscular dystrophy 2H. *J Clin Invest*. 2012; 122:1764–76.  
<https://doi.org/10.1172/JCI59581> PMID:22505452
37. Burton DG, Krizhanovsky V. Physiological and pathological consequences of cellular senescence. *Cell Mol Life Sci*. 2014; 71:4373–86.  
<https://doi.org/10.1007/s00018-014-1691-3>  
PMID:25080110
38. Li JY, Huang WQ, Tu RH, Zhong GQ, Luo BB, He Y. Resveratrol rescues hyperglycemia-induced endothelial dysfunction via activation of akt. *Acta Pharmacol Sin*. 2017; 38:182–91.  
<https://doi.org/10.1038/aps.2016.109>  
PMID:27941804
39. Mikuła-Pietrasik J, Uruski P, Aniukiewicz K, Sosińska P, Krasieński Z, Tykarski A, Książek K. Serum from varicose patients induces senescence-related dysfunction of vascular endothelium generating local and systemic proinflammatory conditions. *Oxid Med Cell Longev*. 2016; 2016:2069290.  
<https://doi.org/10.1155/2016/2069290>  
PMID:27994710

40. Bochenek ML, Schütz E, Schäfer K. Endothelial cell senescence and thrombosis: ageing clots. *Thromb Res.* 2016; 147:36–45.  
<https://doi.org/10.1016/j.thromres.2016.09.019>  
PMID:[27669126](https://pubmed.ncbi.nlm.nih.gov/27669126/)
41. Okada Y, Nishikawa J, Semma M, Ichikawa A. Induction of integrin  $\beta$ 3 in PGE<sub>2</sub>-stimulated adhesion of mastocytoma P-815 cells to the arg-gly-asp-enriched fragment of fibronectin. *Biochem Pharmacol.* 2011; 81:866–72.  
<https://doi.org/10.1016/j.bcp.2011.01.010>  
PMID:[21276770](https://pubmed.ncbi.nlm.nih.gov/21276770/)
42. Zhao J, Jiang X, Yan L, Lin J, Guo H, Yu S, Ye B, Zhu J, Zhang W. Retinoic acid inducible gene-1 slows down cellular senescence through negatively regulating the integrin  $\beta$ 3/p38 MAPK pathway. *Cell Cycle.* 2019; 18:3378–92.  
<https://doi.org/10.1080/15384101.2019.1677074>  
PMID:[31595820](https://pubmed.ncbi.nlm.nih.gov/31595820/)
43. Muthuramalingam K, Cho M, Kim Y. Cellular senescence and EMT crosstalk in bleomycin-induced pathogenesis of pulmonary fibrosis-an in vitro analysis. *Cell Biol Int.* 2020; 44:477–87.  
<https://doi.org/10.1002/cbin.11248>  
PMID:[31631444](https://pubmed.ncbi.nlm.nih.gov/31631444/)
44. Cordes N, van Beuningen D. Cell adhesion to the extracellular matrix protein fibronectin modulates radiation-dependent G2 phase arrest involving integrin-linked kinase (ILK) and glycogen synthase kinase-3beta (GSK-3beta) in vitro. *Br J Cancer.* 2003; 88:1470–79.  
<https://doi.org/10.1038/sj.bjc.6600912>  
PMID:[12778079](https://pubmed.ncbi.nlm.nih.gov/12778079/)
45. Troyano N, Nogal MD, Mora I, Diaz-Naves M, Lopez-Carrillo N, Sosa P, Rodriguez-Puyol D, Olmos G, Ruiz-Torres MP. Hyperphosphatemia induces cellular senescence in human aorta smooth muscle cells through integrin linked kinase (ILK) up-regulation. *Mech Ageing Dev.* 2015; 152:43–55.  
<https://doi.org/10.1016/j.mad.2015.10.001>  
PMID:[26467393](https://pubmed.ncbi.nlm.nih.gov/26467393/)
46. Vasilaki A, Mansouri A, Van Remmen H, van der Meulen JH, Larkin L, Richardson AG, McArdle A, Faulkner JA, Jackson MJ. Free radical generation by skeletal muscle of adult and old mice: effect of contractile activity. *Aging Cell.* 2006; 5:109–17.  
<https://doi.org/10.1111/j.1474-9726.2006.00198.x>  
PMID:[16626390](https://pubmed.ncbi.nlm.nih.gov/16626390/)
47. Lu T, Finkel T. Free radicals and senescence. *Exp Cell Res.* 2008; 314:1918–22.  
<https://doi.org/10.1016/j.yexcr.2008.01.011>  
PMID:[18282568](https://pubmed.ncbi.nlm.nih.gov/18282568/)
48. Nogueira GB, Punaro GR, Oliveira CS, Maciel FR, Fernandes TO, Lima DY, Rodrigues AM, Mouro MG, Araujo SR, Higa EM. N-acetylcysteine protects against diabetic nephropathy through control of oxidative and nitrosative stress by recovery of nitric oxide in rats. *Nitric Oxide.* 2018; 78:22–31.  
<https://doi.org/10.1016/j.niox.2018.05.003>  
PMID:[29778909](https://pubmed.ncbi.nlm.nih.gov/29778909/)
49. Kulasekaran P, Scavone CA, Rogers DS, Arenberg DA, Thannickal VJ, Horowitz JC. Endothelin-1 and transforming growth factor-beta1 independently induce fibroblast resistance to apoptosis via AKT activation. *Am J Respir Cell Mol Biol.* 2009; 41:484–93.  
<https://doi.org/10.1165/rcmb.2008-0447OC>  
PMID:[19188658](https://pubmed.ncbi.nlm.nih.gov/19188658/)
50. Del Bufalo D, Di Castro V, Biroccio A, Varmi M, Salani D, Rosanò L, Triscioglio D, Spinella F, Bagnato A. Endothelin-1 protects ovarian carcinoma cells against paclitaxel-induced apoptosis: requirement for akt activation. *Mol Pharmacol.* 2002; 61:524–32.  
<https://doi.org/10.1124/mol.61.3.524>  
PMID:[11854432](https://pubmed.ncbi.nlm.nih.gov/11854432/)
51. Barton M. Aging and endothelin: determinants of disease. *Life Sci.* 2014; 118:97–109.  
<https://doi.org/10.1016/j.lfs.2014.09.009>  
PMID:[25239727](https://pubmed.ncbi.nlm.nih.gov/25239727/)
52. Pérez-Rivero G, Ruiz-Torres MP, Rivas-Elena JV, Jerkic M, Díez-Marques ML, Lopez-Novoa JM, Blasco MA, Rodríguez-Puyol D. Mice deficient in telomerase activity develop hypertension because of an excess of endothelin production. *Circulation.* 2006; 114:309–17.  
<https://doi.org/10.1161/CIRCULATIONAHA.105.611111>  
PMID:[16831983](https://pubmed.ncbi.nlm.nih.gov/16831983/)
53. Cisternas P, Vio CP, Inestrosa NC. Role of Wnt signaling in tissue fibrosis, lessons from skeletal muscle and kidney. *Curr Mol Med.* 2014; 14:510–22.  
<https://doi.org/10.2174/1566524014666140414210346> PMID:[24730522](https://pubmed.ncbi.nlm.nih.gov/24730522/)
54. Baker DJ, Childs BG, Durik M, Wijers ME, Sieben CJ, Zhong J, Saltness RA, Jeganathan KB, Verzosa GC, Pezeshki A, Khazaie K, Miller JD, van Deursen JM. Naturally occurring p16(Ink4a)-positive cells shorten healthy lifespan. *Nature.* 2016; 530:184–89.  
<https://doi.org/10.1038/nature16932>  
PMID:[26840489](https://pubmed.ncbi.nlm.nih.gov/26840489/)
55. Baker DJ, Wijshake T, Tchkonia T, LeBrasseur NK, Childs BG, van de Sluis B, Kirkland JL, van Deursen JM. Clearance of p16Ink4a-positive senescent cells delays ageing-associated disorders. *Nature.* 2011; 479:232–36.  
<https://doi.org/10.1038/nature10600> PMID:[22048312](https://pubmed.ncbi.nlm.nih.gov/22048312/)
56. Meyer MR, Fredette NC, Sharma G, Barton M, Prossnitz ER. GPER is required for the age-dependent

- upregulation of the myocardial endothelin system. *Life Sci.* 2016; 159:61–65.  
<https://doi.org/10.1016/j.lfs.2016.02.041>  
PMID:[26880534](https://pubmed.ncbi.nlm.nih.gov/26880534/)
57. DiMario JX. KLF10 gene expression modulates fibrosis in dystrophic skeletal muscle. *Am J Pathol.* 2018; 188:1263–75.  
<https://doi.org/10.1016/j.ajpath.2018.01.014>  
PMID:[29458012](https://pubmed.ncbi.nlm.nih.gov/29458012/)
58. Harada T, Horinouchi T, Higa T, Hoshi A, Higashi T, Terada K, Mai Y, Nepal P, Horiguchi M, Hatate C, Miwa S. Endothelin-1 activates extracellular signal-regulated kinases 1/2 via transactivation of platelet-derived growth factor receptor in rat L6 myoblasts. *Life Sci.* 2014; 104:24–31.  
<https://doi.org/10.1016/j.lfs.2014.04.002>  
PMID:[24735959](https://pubmed.ncbi.nlm.nih.gov/24735959/)

SUPPLEMENTARY MATERIALS

Supplementary Figures

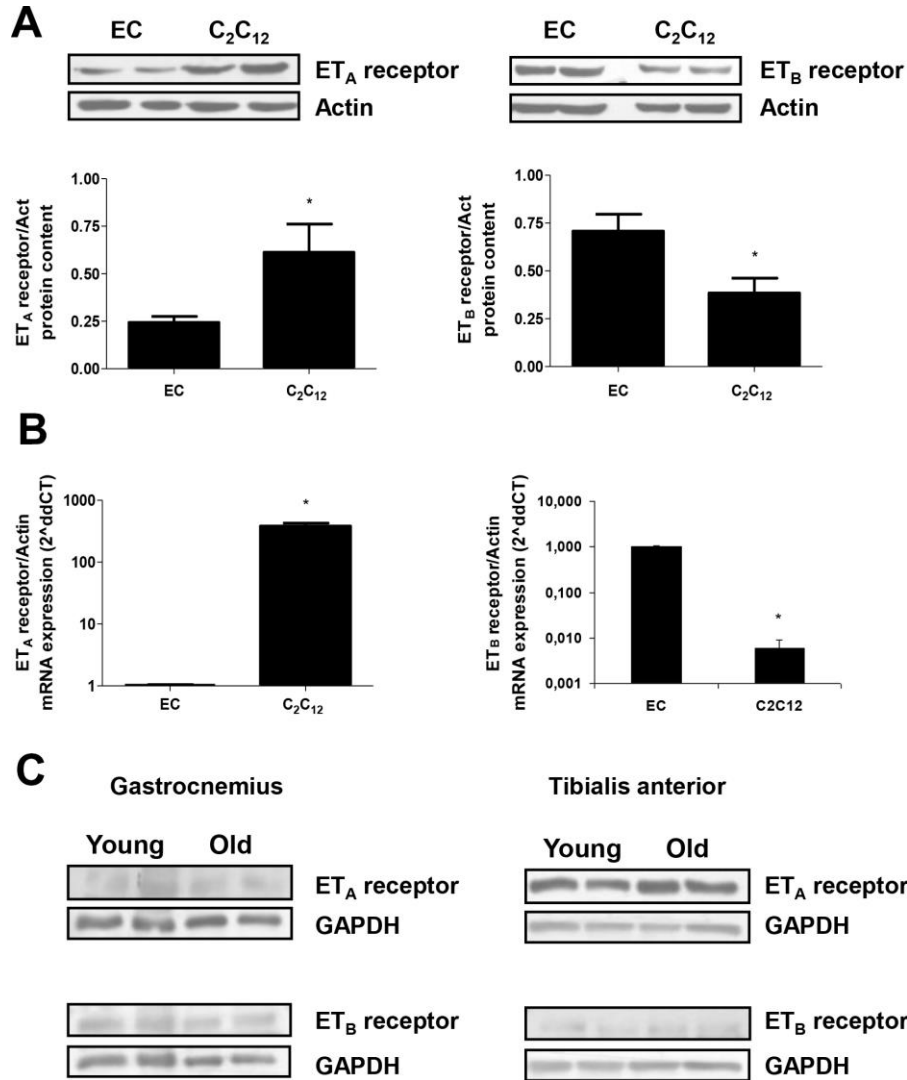

**Supplementary Figure 1. Expression of ET receptors in mouse myoblasts (C<sub>2</sub>C<sub>12</sub>) and gastrocnemius and tibialis anterior muscles from mice.** Expressions of ET<sub>A</sub> and ET<sub>B</sub> receptors were assessed in cultured cells, endothelial cells (EC) and mouse myoblasts (C<sub>2</sub>C<sub>12</sub>) (A, B), and mice muscles (C), by Western blot (A, C) and by RT-qPCR in cells (B). Representative Western blots are shown at the top of panel A with the densitometric analyses below. Values are the mean±SEM of 3 independent experiments, \*p<0.05 vs. endothelial cells (EC).

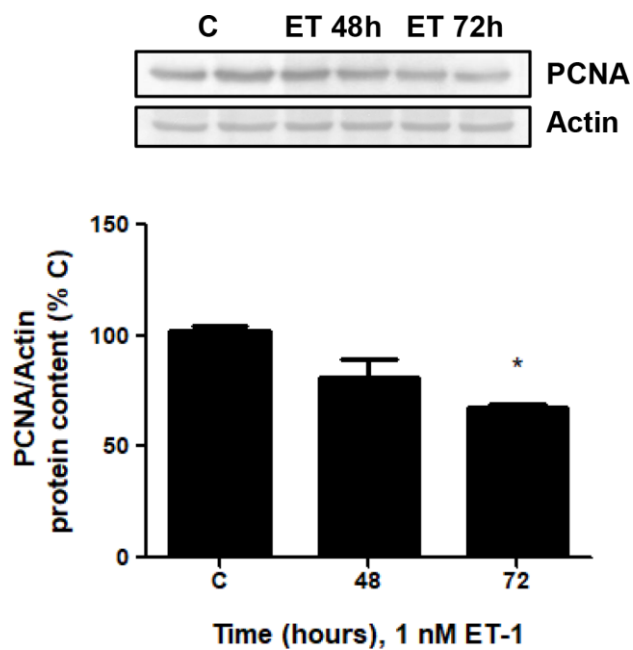

**Supplementary Figure 2. Endothelin-1 reduces PCNA expression in mouse myoblasts (C<sub>2</sub>C<sub>12</sub>).** Cells were incubated with 1 nM ET-1 at different times. Then, PCNA protein content was assessed by Western blot. A representative Western blot is shown at the top with the densitometric analysis below. Values are the mean±SEM of 3 independent experiments, \*p<0.05 vs. control cells (C).

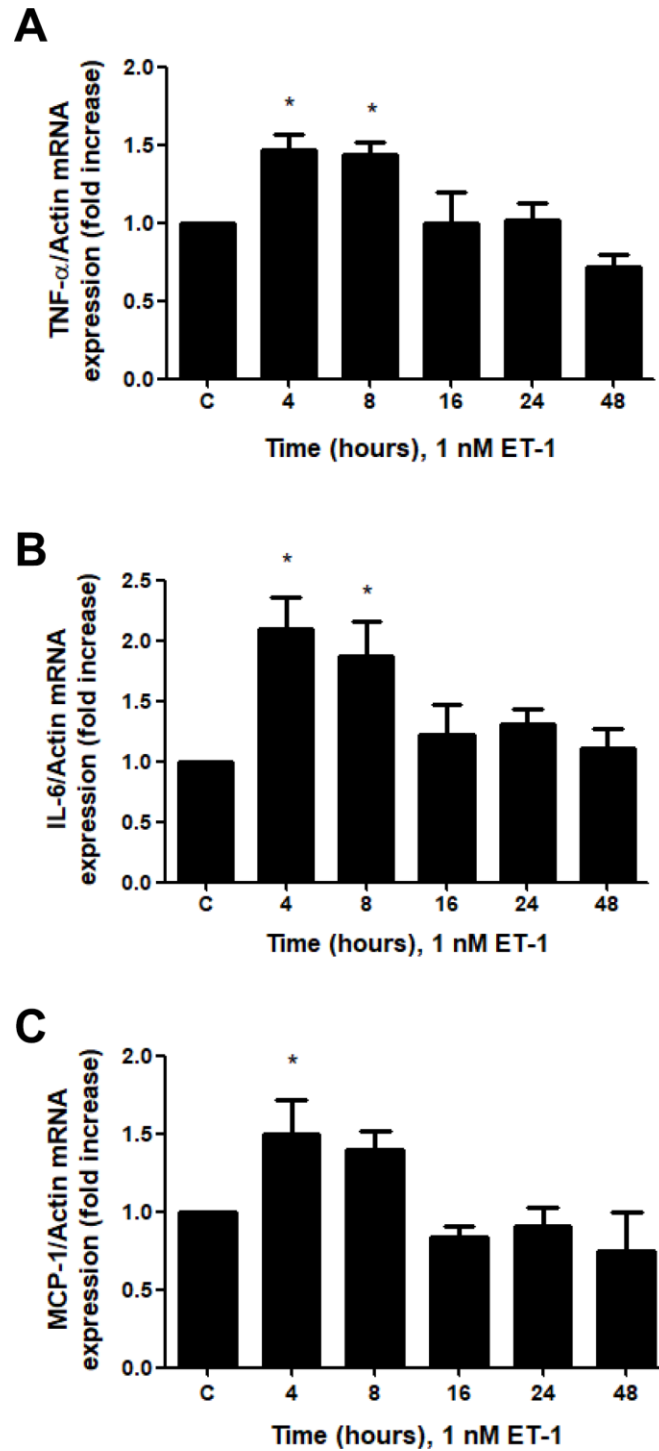

**Supplementary Figure 3. Endothelin-1 increases pro-inflammatory cytokines expression in mouse myoblasts (C<sub>2</sub>C<sub>12</sub>).** Cells were incubated with 1 nM ET-1 at different times. Then, TNF- $\alpha$  (A), IL-6 (B) and MCP-1 (C) mRNA expressions were assessed by real-time PCR. Values are the mean $\pm$ SEM of 3 independent experiments, \* $p$ <0.05 vs. control cells (C).
