# Supplementary material for: Endothelin-1 induces cellular senescence and fibrosis in cultured myoblasts. A potential mechanism of aging-related sarcopenia
Source: publisher site journal article supplement (doi:10.18632/aging.103450), 2020-06-22
Supplement: Supplementary file [file aging-v12i12-103450-supplementary-material-SD1.pdf]

**SUPPLEMENTARY FIGURES**

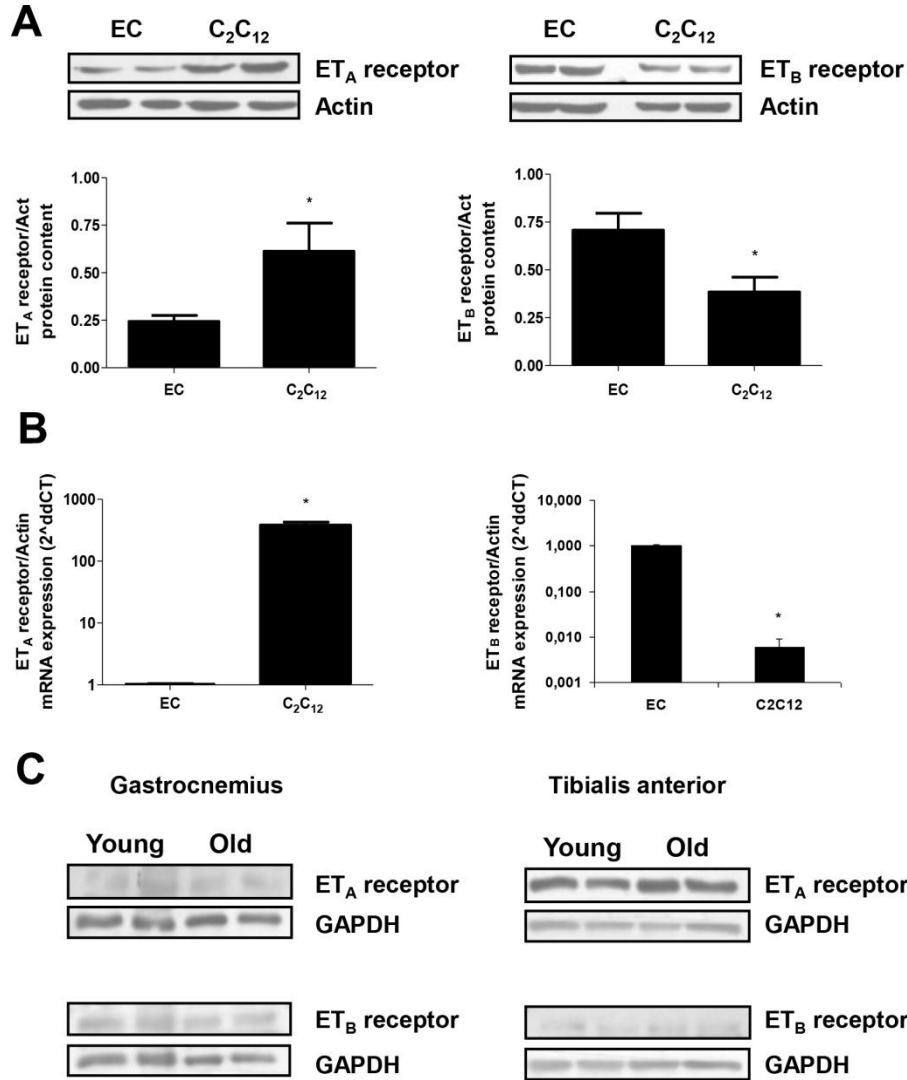

**Supplementary Figure 1. Expression of ET receptors in mouse myoblasts (C<sub>2</sub>C<sub>12</sub>) and gastrocnemius and tibialis anterior muscles from mice.** Expressions of ET<sub>A</sub> and ET<sub>B</sub> receptors were assessed in cultured cells, endothelial cells (EC) and mouse myoblasts (C<sub>2</sub>C<sub>12</sub>) (A, B), and mice muscles (C), by Western blot (A, C) and by RT-qPCR in cells (B). Representative Western blots are shown at the top of panel A with the densitometric analyses below. Values are the mean±SEM of 3 independent experiments, \*p<0.05 vs. endothelial cells (EC).

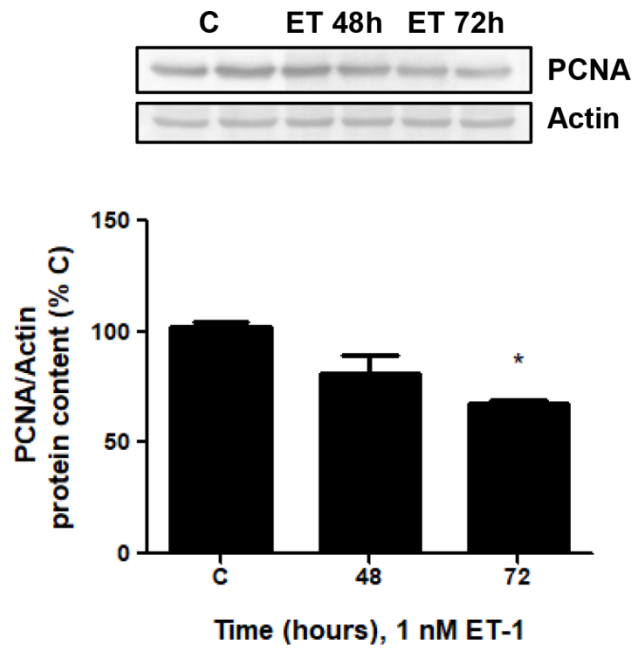

**Supplementary Figure 2. Endothelin-1 reduces PCNA expression in mouse myoblasts (C<sub>2</sub>C<sub>12</sub>).** Cells were incubated with 1 nM ET-1 at different times. Then, PCNA protein content was assessed by Western blot. A representative Western blot is shown at the top with the densitometric analysis below. Values are the mean±SEM of 3 independent experiments, \*p<0.05 vs. control cells (C).

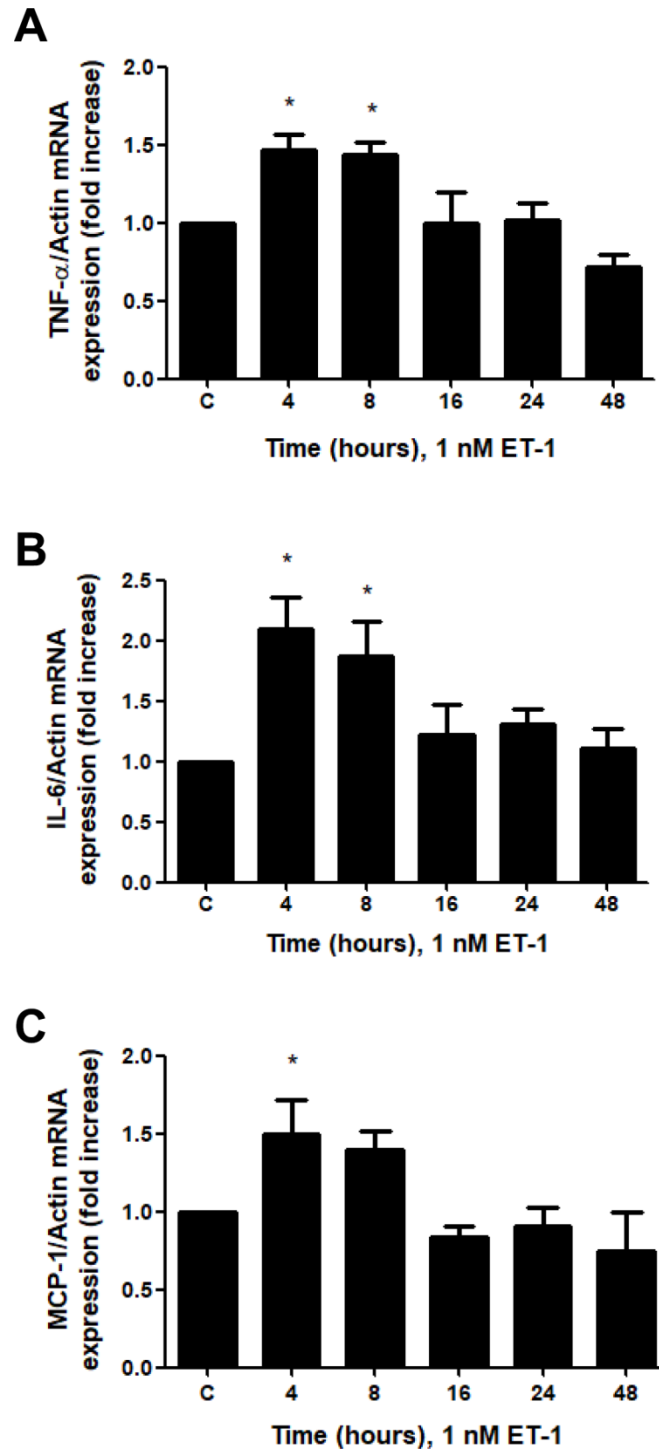

**Supplementary Figure 3. Endothelin-1 increases pro-inflammatory cytokines expression in mouse myoblasts (C<sub>2</sub>C<sub>12</sub>).** Cells were incubated with 1 nM ET-1 at different times. Then, TNF- $\alpha$  (A), IL-6 (B) and MCP-1 (C) mRNA expressions were assessed by real-time PCR. Values are the mean $\pm$ SEM of 3 independent experiments, \*p<0.05 vs. control cells (C).
